# Supplementary material
Source: PubMed Central journal article supplement (PMC10409878)
Supplement: NIHMS1875298-supplement-Appendix.pdf [file NIHMS1875298-supplement-Appendix.pdf]

## APPENDIX

A total of 7 separate lists of differentially expressed proteins that met our criteria of at least 3 PSMs, an uncorrected edgeR p-value of <0.05, and a fold change of +1.5, are attached below for each volcano plot figure. Summary statistics are also provided for each protein.

Click on the bullet triangle points to expand each table.

**Table A.1**  
Differentially expressed proteins between the half-strip replicates (first half and second half) – see Fig. 3A

| Accession                 | PSMs | LogFC | FC    | PValue | mean_first | mean_second | SD_first | SD_second | CV_first | CV_second | direction |
|---------------------------|------|-------|-------|--------|------------|-------------|----------|-----------|----------|-----------|-----------|
| sp P04279 SEMG1_HUMAN     | 4    | -2.47 | -5.53 | 0.001  | 20858      | 3774        | 37252    | 1522      | 1.79     | 0.40      | down      |
| sp Q13443 ADAM9_HUMAN     | 4    | -1.94 | -3.83 | 0.004  | 1317       | 344         | 850      | 416       | 0.65     | 1.21      | down      |
| sp Q53LP3 SWAHC_HUMAN     | 3    | -1.91 | -3.77 | 0.014  | 1833       | 486         | 936      | 847       | 0.51     | 1.74      | down      |
| sp Q7Z6J4 FGD2_HUMAN      | 4    | -1.41 | -2.66 | 0.043  | 893        | 336         | 656      | 403       | 0.73     | 1.20      | down      |
| sp Q08554 DSC1_HUMAN      | 12   | -0.97 | -1.95 | 0.027  | 47172      | 24150       | 40369    | 9732      | 0.86     | 0.40      | down      |
| sp P15924 DESP_HUMAN      | 131  | -0.80 | -1.74 | 0.026  | 1309162    | 754195      | 935169   | 201334    | 0.71     | 0.27      | down      |
| sp O14979 HNRDL_HUMAN     | 3    | -0.69 | -1.62 | 0.047  | 15758      | 9737        | 11357    | 2524      | 0.72     | 0.26      | down      |
| sp P80723 BASP1_HUMAN     | 28   | 0.59  | 1.50  | 0.033  | 56671      | 85092       | 14297    | 38079     | 0.25     | 0.45      | up        |
| sp P11215 ITAM_HUMAN      | 16   | 0.72  | 1.65  | 0.026  | 36165      | 59493       | 10439    | 36684     | 0.29     | 0.62      | up        |
| sp P08567 PLEK_HUMAN      | 3    | 0.73  | 1.66  | 0.004  | 8046       | 13356       | 2074     | 5327      | 0.26     | 0.40      | up        |
| sp P05164 PERM_HUMAN      | 37   | 0.90  | 1.87  | 0.006  | 288511     | 538775      | 90228    | 353705    | 0.31     | 0.66      | up        |
| sp P08246 ELNE_HUMAN      | 20   | 0.93  | 1.90  | 0.009  | 221136     | 420538      | 93052    | 256240    | 0.42     | 0.61      | up        |
| sp P08311 CATG_HUMAN      | 25   | 0.98  | 1.97  | 0.009  | 115956     | 228323      | 41688    | 170627    | 0.36     | 0.75      | up        |
| sp P24158 PRTN3_HUMAN     | 16   | 0.99  | 1.99  | 0.018  | 186373     | 370206      | 102625   | 256786    | 0.55     | 0.69      | up        |
| sp P49913 CAMP_HUMAN      | 10   | 1.01  | 2.01  | 0.002  | 50608      | 101835      | 19802    | 56970     | 0.39     | 0.56      | up        |
| sp P10153 RNAS2_HUMAN     | 5    | 1.05  | 2.06  | 0.002  | 12517      | 25827       | 4504     | 16278     | 0.36     | 0.63      | up        |
| sp P20160 CAP7_HUMAN      | 36   | 1.25  | 2.38  | 0.002  | 100092     | 238155      | 33802    | 202738    | 0.34     | 0.85      | up        |
| sp P59665 DEF1_HUMAN (+1) | 17   | 1.29  | 2.44  | 0.017  | 104310     | 254952      | 68169    | 245646    | 0.65     | 0.96      | up        |
| sp P32320 CDD_HUMAN       | 5    | 1.64  | 3.11  | 0.043  | 457        | 1423        | 826      | 864       | 1.81     | 0.61      | up        |

**Table A.2**  
Differentially expressed proteins between left eye and right eye (reference) – see Fig. 3B

| Accession            | PSMs | LogFC | FC    | PValue | mean_left | mean_right | SD_left | SD_right | CV_left | CV_right | direction |
|----------------------|------|-------|-------|--------|-----------|------------|---------|----------|---------|----------|-----------|
| sp O60841 IF2P_HUMAN | 3    | -0.86 | -1.82 | 0.001  | 230072    | 126412     | 127720  | 18894    | 0.56    | 0.15     | down      |

**Table A.3**  
Differentially expressed proteins between long schirmer strip and short schirmer strip (reference) – see Fig. 5A

| Accession                | PSMs | logFC | FC    | PValue | mean_short | mean_long | SD_short | SD_long | CV_short | CV_long | direction |
|--------------------------|------|-------|-------|--------|------------|-----------|----------|---------|----------|---------|-----------|
| sp Q96176 MMS19_HUMAN    | 3    | -1.85 | -3.60 | 0.001  | 2344       | 651       | 589      | 747     | 0.25     | 1.15    | down      |
| sp Q13325 IFIT5_HUMAN    | 5    | -1.76 | -3.40 | 0.001  | 4659       | 1372      | 1103     | 1220    | 0.24     | 0.89    | down      |
| sp Q9UBC2 EP15R_HUMAN    | 3    | -1.75 | -3.37 | 0.005  | 2096       | 622       | 1074     | 593     | 0.51     | 0.95    | down      |
| sp Q9Y508 RN114_HUMAN    | 7    | -1.69 | -3.23 | 0.001  | 2372       | 733       | 423      | 618     | 0.18     | 0.84    | down      |
| sp P27482 CALL3_HUMAN    | 9    | -1.63 | -3.10 | 0.000  | 21015      | 6772      | 12274    | 3498    | 0.58     | 0.52    | down      |
| sp Q9HC07 TM165_HUMAN    | 5    | -1.53 | -2.88 | 0.006  | 1782       | 619       | 688      | 618     | 0.39     | 1.00    | down      |
| sp Q9HB21 PKHA1_HUMAN    | 5    | -1.46 | -2.75 | 0.008  | 2767       | 1008      | 308      | 1044    | 0.11     | 1.04    | down      |
| sp P45983 MK08_HUMAN     | 4    | -1.31 | -2.48 | 0.011  | 2720       | 1098      | 617      | 803     | 0.23     | 0.73    | down      |
| sp Q9BQE3 TBA1C_HUMAN    | 6    | -1.30 | -2.46 | 0.000  | 13781      | 5599      | 3538     | 2763    | 0.26     | 0.49    | down      |
| sp Q9Y2W1 TR150_HUMAN    | 3    | -1.25 | -2.38 | 0.041  | 1636       | 689       | 1003     | 741     | 0.61     | 1.08    | down      |
| sp P30838 AL3A1_HUMAN    | 85   | -1.21 | -2.31 | 0.000  | 2227718    | 964452    | 754334   | 357045  | 0.34     | 0.37    | down      |
| sp Q8WVJ2 NUDC2_HUMAN    | 5    | -1.20 | -2.30 | 0.008  | 3463       | 1503      | 763      | 957     | 0.22     | 0.64    | down      |
| sp Q14002 CEAM7_HUMAN    | 9    | -1.20 | -2.29 | 0.001  | 66936      | 29188     | 32777    | 7880    | 0.49     | 0.27    | down      |
| sp Q9UJW0 DCTN4_HUMAN    | 3    | -1.15 | -2.22 | 0.019  | 1349       | 606       | 408      | 561     | 0.30     | 0.93    | down      |
| sp Q03519 TAP2_HUMAN     | 4    | -1.15 | -2.21 | 0.023  | 8940       | 4038      | 4797     | 2673    | 0.54     | 0.66    | down      |
| sp P07738 PMGE_HUMAN     | 4    | -1.10 | -2.15 | 0.023  | 6248       | 2909      | 2352     | 1807    | 0.38     | 0.62    | down      |
| sp P23381 SYWC_HUMAN     | 33   | -1.08 | -2.11 | 0.000  | 313385     | 148582    | 200257   | 28251   | 0.64     | 0.19    | down      |
| sp Q9BPW9 DHRS9_HUMAN    | 5    | -1.08 | -2.11 | 0.006  | 31051      | 14727     | 18033    | 4713    | 0.58     | 0.32    | down      |
| sp Q9Y2B0 CNPY2_HUMAN    | 4    | -1.07 | -2.10 | 0.045  | 1633       | 778       | 668      | 726     | 0.41     | 0.93    | down      |
| sp Q6IQ22 RAB12_HUMAN    | 3    | -1.06 | -2.09 | 0.045  | 2871       | 1372      | 512      | 1089    | 0.18     | 0.79    | down      |
| sp Q93009 UBP7_HUMAN     | 3    | -1.05 | -2.08 | 0.038  | 1786       | 860       | 353      | 756     | 0.20     | 0.88    | down      |
| sp P10398 ARAF_HUMAN     | 3    | -1.05 | -2.08 | 0.047  | 1935       | 932       | 425      | 1027    | 0.22     | 1.10    | down      |
| sp Q03518 TAP1_HUMAN     | 6    | -1.05 | -2.07 | 0.033  | 8072       | 3897      | 4375     | 2380    | 0.54     | 0.61    | down      |
| sp Q9BQE5 APOL2_HUMAN    | 5    | -1.04 | -2.05 | 0.002  | 27362      | 13321     | 14090    | 5573    | 0.51     | 0.42    | down      |
| sp P42574 CASP3_HUMAN    | 15   | -0.93 | -1.90 | 0.000  | 89932      | 47265     | 13751    | 9466    | 0.15     | 0.20    | down      |
| sp P30740 ILEU_HUMAN     | 142  | -0.91 | -1.88 | 0.000  | 2828144    | 1507176   | 720565   | 138989  | 0.25     | 0.09    | down      |
| sp P80217 IN35_HUMAN     | 7    | -0.90 | -1.86 | 0.000  | 60865      | 32653     | 12437    | 9830    | 0.20     | 0.30    | down      |
| sp Q01469 FABP5_HUMAN    | 60   | -0.88 | -1.84 | 0.000  | 706868     | 383370    | 245743   | 76312   | 0.35     | 0.20    | down      |
| sp Q9NZ32 ARP10_HUMAN    | 4    | -0.83 | -1.77 | 0.043  | 5537       | 3122      | 1107     | 1498    | 0.20     | 0.48    | down      |
| sp P22528 SPR1B_HUMAN    | 6    | -0.82 | -1.77 | 0.036  | 210407     | 119038    | 126197   | 64795   | 0.60     | 0.54    | down      |
| sp P42224 STAT1_HUMAN    | 46   | -0.81 | -1.76 | 0.000  | 502295     | 285576    | 160456   | 58596   | 0.32     | 0.21    | down      |
| sp P10321 HLAC_HUMAN     | 4    | -0.81 | -1.76 | 0.022  | 9374       | 5340      | 2629     | 3202    | 0.28     | 0.60    | down      |
| sp P15104 GLNA_HUMAN     | 34   | -0.80 | -1.75 | 0.000  | 386724     | 221453    | 134158   | 58995   | 0.35     | 0.27    | down      |
| sp Q8WTS6 SETD7_HUMAN    | 3    | -0.78 | -1.72 | 0.008  | 5527       | 3207      | 1001     | 1522    | 0.18     | 0.47    | down      |
| sp Q9NZN3 EHD3_HUMAN     | 7    | -0.77 | -1.70 | 0.005  | 16365      | 9601      | 6014     | 3396    | 0.37     | 0.35    | down      |
| sp Q86YS7 C2CD5_HUMAN    | 4    | -0.76 | -1.70 | 0.010  | 3403       | 2002      | 1270     | 338     | 0.37     | 0.17    | down      |
| sp P09914 IFIT1_HUMAN    | 7    | -0.75 | -1.69 | 0.001  | 51913      | 30777     | 18149    | 5077    | 0.35     | 0.16    | down      |
| sp P43405 KSYK_HUMAN     | 8    | -0.75 | -1.68 | 0.001  | 17229      | 10248     | 1626     | 3923    | 0.09     | 0.38    | down      |
| sp Q99805 TM9S2_HUMAN    | 7    | -0.74 | -1.67 | 0.034  | 16148      | 9658      | 1750     | 6134    | 0.11     | 0.64    | down      |
| sp O60841 IF2P_HUMAN     | 6    | -0.74 | -1.67 | 0.000  | 8696       | 5222      | 1442     | 829     | 0.17     | 0.16    | down      |
| sp O14879 IFIT3_HUMAN    | 13   | -0.73 | -1.65 | 0.001  | 17245      | 10428     | 4270     | 2635    | 0.25     | 0.25    | down      |
| sp P21980 TGM2_HUMAN     | 280  | -0.72 | -1.64 | 0.013  | 3418228    | 2078435   | 1265972  | 792628  | 0.37     | 0.38    | down      |
| sp P52209 PGD_HUMAN      | 110  | -0.71 | -1.64 | 0.000  | 1897556    | 1159852   | 275889   | 205190  | 0.15     | 0.18    | down      |
| sp Q9UN36 NDRG2_HUMAN    | 29   | -0.71 | -1.64 | 0.000  | 555504     | 339649    | 159140   | 51075   | 0.29     | 0.15    | down      |
| sp P50454 SERPH_HUMAN    | 6    | -0.70 | -1.63 | 0.000  | 38348      | 23543     | 8876     | 4664    | 0.23     | 0.20    | down      |
| sp Q6IA69 NADE_HUMAN     | 7    | -0.69 | -1.61 | 0.002  | 14620      | 9077      | 2131     | 3105    | 0.15     | 0.34    | down      |
| sp Q15847 ADIRF_HUMAN    | 5    | -0.69 | -1.61 | 0.009  | 13236      | 8223      | 3833     | 3039    | 0.29     | 0.37    | down      |
| sp P20591 MX1_HUMAN      | 32   | -0.68 | -1.61 | 0.001  | 205266     | 127680    | 56772    | 26215   | 0.28     | 0.21    | down      |
| sp Q16625 OCLN_HUMAN     | 3    | -0.68 | -1.60 | 0.010  | 7240       | 4513      | 1463     | 1832    | 0.20     | 0.41    | down      |
| sp Q16719 KYNU_HUMAN     | 28   | -0.67 | -1.59 | 0.005  | 667361     | 419734    | 233742   | 86430   | 0.35     | 0.21    | down      |
| sp Q13885 TBB2A_HUMAN    | 3    | -0.67 | -1.59 | 0.044  | 21038      | 13266     | 12337    | 4226    | 0.59     | 0.32    | down      |
| sp Q9H0P0 SNT3A_HUMAN    | 6    | -0.66 | -1.59 | 0.009  | 37171      | 23445     | 10565    | 6305    | 0.28     | 0.27    | down      |
| sp Q9GZP8 IMUP_HUMAN     | 5    | -0.66 | -1.59 | 0.005  | 166288     | 104913    | 26756    | 33884   | 0.16     | 0.32    | down      |
| sp P32456 GBP2_HUMAN     | 11   | -0.66 | -1.58 | 0.003  | 118697     | 75318     | 41675    | 12560   | 0.35     | 0.17    | down      |
| sp Q96KP4 CNDP2_HUMAN    | 92   | -0.65 | -1.57 | 0.000  | 808707     | 514609    | 97461    | 105435  | 0.12     | 0.20    | down      |
| sp Q13075 BIRC1_HUMAN    | 3    | -0.65 | -1.57 | 0.043  | 7122       | 4538      | 3141     | 1840    | 0.44     | 0.41    | down      |
| sp Q9NXA8 SIR5_HUMAN     | 3    | -0.65 | -1.57 | 0.009  | 6551       | 4180      | 1758     | 1062    | 0.27     | 0.25    | down      |
| sp P01903 DRA_HUMAN (+1) | 8    | -0.64 | -1.56 | 0.005  | 169523     | 108803    | 43268    | 30163   | 0.26     | 0.28    | down      |
| sp P31947 1433S_HUMAN    | 33   | -0.63 | -1.55 | 0.013  | 260296     | 167768    | 107672   | 12086   | 0.41     | 0.07    | down      |
| sp O15327 INP4B_HUMAN    | 6    | -0.63 | -1.55 | 0.010  | 11564      | 7472      | 2866     | 2331    | 0.25     | 0.31    | down      |
| sp P21964 COMT_HUMAN     | 30   | -0.63 | -1.55 | 0.001  | 521168     | 336894    | 117033   | 62206   | 0.22     | 0.18    | down      |
| sp P30044 PRDX5_HUMAN    | 79   | -0.63 | -1.55 | 0.001  | 764121     | 493973    | 202710   | 62715   | 0.27     | 0.13    | down      |
| sp P28838 AMPL_HUMAN     | 55   | -0.63 | -1.54 | 0.001  | 1196015    | 774179    | 250638   | 135293  | 0.21     | 0.17    | down      |
| sp Q9UL46 PSME2_HUMAN    | 27   | -0.62 | -1.54 | 0.012  | 287833     | 187335    | 95773    | 36148   | 0.33     | 0.19    | down      |
| sp P29728 OAS2_HUMAN     | 16   | -0.62 | -1.53 | 0.004  | 113308     | 73822     | 39344    | 9543    | 0.35     | 0.13    | down      |

(continued on next page)

Table A.3 (continued)

| Accession                      | PSMs | logFC | FC    | PValue | mean_short | mean_long | SD_short | SD_long | CV_short | CV_long | direction |
|--------------------------------|------|-------|-------|--------|------------|-----------|----------|---------|----------|---------|-----------|
| sp P33241 LSP1_HUMAN           | 14   | -0.61 | -1.53 | 0.035  | 70212      | 45949     | 27538    | 15927   | 0.39     | 0.35    | down      |
| sp Q9ULC6 PAD11_HUMAN          | 6    | -0.61 | -1.53 | 0.035  | 32638      | 21377     | 12377    | 8394    | 0.38     | 0.39    | down      |
| sp O43396 TXNL1_HUMAN          | 24   | -0.61 | -1.52 | 0.000  | 115042     | 75455     | 12637    | 15074   | 0.11     | 0.20    | down      |
| sp O43169 CYB5B_HUMAN          | 6    | -0.61 | -1.52 | 0.009  | 14073      | 9236      | 2571     | 2886    | 0.18     | 0.31    | down      |
| sp Q8NBX0 SCPD_L_HUMAN         | 4    | -0.61 | -1.52 | 0.031  | 46737      | 30700     | 16246    | 11434   | 0.35     | 0.37    | down      |
| sp P19971 TYPH_HUMAN           | 47   | -0.60 | -1.52 | 0.024  | 402469     | 265066    | 146398   | 78972   | 0.36     | 0.30    | down      |
| sp P84085 ARF5_HUMAN           | 5    | -0.60 | -1.52 | 0.026  | 9939       | 6549      | 1214     | 2719    | 0.12     | 0.42    | down      |
| sp O43399 TPD54_HUMAN          | 6    | -0.60 | -1.52 | 0.005  | 10842      | 7150      | 2265     | 1902    | 0.21     | 0.27    | down      |
| sp Q9NQW7 XPP1_HUMAN           | 33   | -0.59 | -1.51 | 0.000  | 317858     | 210759    | 33062    | 38478   | 0.10     | 0.18    | down      |
| sp P07195 LDHB_HUMAN           | 20   | -0.59 | -1.51 | 0.000  | 388204     | 257436    | 55064    | 46862   | 0.14     | 0.18    | down      |
| tr A0A0G2JRO6 A0A0G2JRO6_HUMAN | 11   | -0.59 | -1.51 | 0.035  | 64425      | 42738     | 23435    | 16812   | 0.36     | 0.39    | down      |
| sp P23284 PPIB_HUMAN           | 20   | 0.59  | 1.50  | 0.006  | 629881     | 947769    | 150974   | 265554  | 0.24     | 0.28    | up        |
| sp Q9H4G4 GAPR1_HUMAN          | 4    | 0.59  | 1.51  | 0.028  | 8677       | 13068     | 2302     | 5459    | 0.27     | 0.42    | up        |
| sp Q6YP21 KAT3_HUMAN           | 5    | 0.59  | 1.51  | 0.017  | 19430      | 29262     | 5598     | 9463    | 0.29     | 0.32    | up        |
| sp O60826 CCD22_HUMAN          | 10   | 0.59  | 1.51  | 0.001  | 7428       | 11214     | 1142     | 1987    | 0.15     | 0.18    | up        |
| sp Q9NTJ4 MA2C1_HUMAN          | 3    | 0.60  | 1.52  | 0.001  | 17014      | 25862     | 3611     | 5116    | 0.21     | 0.20    | up        |
| sp P13987 CD59_HUMAN           | 12   | 0.61  | 1.52  | 0.044  | 104779     | 159478    | 26431    | 98122   | 0.25     | 0.62    | up        |
| sp Q15582 BGH3_HUMAN           | 7    | 0.62  | 1.53  | 0.028  | 20327      | 31155     | 8138     | 10561   | 0.40     | 0.34    | up        |
| sp P61086 UBE2K_HUMAN          | 14   | 0.62  | 1.54  | 0.000  | 43664      | 67177     | 6430     | 9388    | 0.15     | 0.14    | up        |
| sp Q9BRG2 SH23A_HUMAN          | 7    | 0.62  | 1.54  | 0.001  | 11437      | 17622     | 372      | 4904    | 0.03     | 0.28    | up        |
| sp P0C870 JMD7_HUMAN           | 3    | 0.62  | 1.54  | 0.006  | 2997       | 4617      | 503      | 978     | 0.17     | 0.21    | up        |
| sp O14787 TNPO2_HUMAN          | 5    | 0.63  | 1.55  | 0.020  | 30111      | 46641     | 5283     | 26730   | 0.18     | 0.57    | up        |
| sp O00468 AGRIN_HUMAN          | 16   | 0.64  | 1.56  | 0.010  | 9794       | 15292     | 2238     | 5554    | 0.23     | 0.36    | up        |
| sp Q9NZL4 HPBP1_HUMAN          | 3    | 0.65  | 1.57  | 0.015  | 4950       | 7748      | 1648     | 2675    | 0.33     | 0.35    | up        |
| sp Q9H3S4 TPK1_HUMAN           | 8    | 0.65  | 1.57  | 0.020  | 16556      | 26006     | 2947     | 14451   | 0.18     | 0.56    | up        |
| sp P39060 COIA1_HUMAN          | 4    | 0.66  | 1.58  | 0.004  | 4844       | 7632      | 1005     | 1929    | 0.21     | 0.25    | up        |
| sp P41227 NAA10_HUMAN          | 5    | 0.66  | 1.58  | 0.006  | 25991      | 41088     | 5085     | 16669   | 0.20     | 0.41    | up        |
| sp P01715 LV301_HUMAN          | 7    | 0.66  | 1.58  | 0.025  | 29108      | 46131     | 12878    | 17118   | 0.44     | 0.37    | up        |
| sp Q9NUP9 LIN7C_HUMAN          | 3    | 0.67  | 1.59  | 0.016  | 7383       | 11728     | 2099     | 4627    | 0.28     | 0.39    | up        |
| sp Q16348 S15A2_HUMAN          | 3    | 0.67  | 1.59  | 0.001  | 7542       | 11993     | 1566     | 2341    | 0.21     | 0.20    | up        |
| sp O95671 ASML_HUMAN           | 11   | 0.67  | 1.59  | 0.002  | 18934      | 30120     | 3604     | 10149   | 0.19     | 0.34    | up        |
| sp P54803 GALC_HUMAN           | 3    | 0.67  | 1.59  | 0.011  | 17165      | 27320     | 3376     | 11736   | 0.20     | 0.43    | up        |
| sp P04839 CY24B_HUMAN          | 6    | 0.67  | 1.59  | 0.024  | 11300      | 17995     | 3629     | 8051    | 0.32     | 0.45    | up        |
| sp O60271 JIP4_HUMAN           | 12   | 0.67  | 1.60  | 0.031  | 19626      | 31326     | 1341     | 22855   | 0.07     | 0.73    | up        |
| sp O60573 IF4E2_HUMAN          | 3    | 0.69  | 1.61  | 0.043  | 8922       | 14349     | 1534     | 11001   | 0.17     | 0.77    | up        |
| sp P84095 RHOG_HUMAN           | 6    | 0.69  | 1.61  | 0.007  | 11562      | 18608     | 2313     | 7078    | 0.20     | 0.38    | up        |
| sp Q96QA5 GSDMA_HUMAN          | 6    | 0.69  | 1.62  | 0.041  | 55605      | 89806     | 33503    | 30421   | 0.60     | 0.34    | up        |
| sp Q9BUJ2 HNRL1_HUMAN          | 3    | 0.69  | 1.62  | 0.022  | 7550       | 12220     | 1883     | 6727    | 0.25     | 0.55    | up        |
| sp Q8N1F7 NUP93_HUMAN          | 6    | 0.70  | 1.63  | 0.001  | 20926      | 34084     | 2448     | 11021   | 0.12     | 0.32    | up        |
| sp P62312 LSM6_HUMAN           | 3    | 0.71  | 1.64  | 0.011  | 6899       | 11291     | 1989     | 4169    | 0.29     | 0.37    | up        |
| sp Q8IV08 PLD3_HUMAN           | 4    | 0.71  | 1.64  | 0.000  | 7984       | 13092     | 1883     | 1769    | 0.24     | 0.14    | up        |
| sp O00479 HMGN4_HUMAN          | 3    | 0.72  | 1.65  | 0.015  | 7908       | 13052     | 3105     | 5652    | 0.39     | 0.43    | up        |
| sp A0A0B4J1V2 HV226_HUMAN      | 8    | 0.73  | 1.65  | 0.037  | 71979      | 119104    | 21264    | 65708   | 0.30     | 0.55    | up        |
| sp Q10471 GALT2_HUMAN          | 12   | 0.73  | 1.66  | 0.002  | 60160      | 99640     | 12958    | 34965   | 0.22     | 0.35    | up        |
| sp P12821 ACE_HUMAN            | 8    | 0.73  | 1.66  | 0.004  | 32673      | 54154     | 12807    | 17251   | 0.39     | 0.32    | up        |
| sp O75882 ATRN_HUMAN           | 26   | 0.73  | 1.66  | 0.000  | 114009     | 189026    | 12924    | 41342   | 0.11     | 0.22    | up        |
| sp Q92542 NICA_HUMAN           | 4    | 0.73  | 1.66  | 0.006  | 5461       | 9063      | 882      | 4295    | 0.16     | 0.47    | up        |
| sp A0A0J9YXX1 HV5X1_HUMAN      | 3    | 0.73  | 1.66  | 0.018  | 35774      | 59463     | 7894     | 30019   | 0.22     | 0.50    | up        |
| sp P42785 PCP_HUMAN            | 4    | 0.74  | 1.67  | 0.000  | 18877      | 31456     | 3972     | 7971    | 0.21     | 0.25    | up        |
| sp P00748 FA12_HUMAN           | 11   | 0.74  | 1.67  | 0.010  | 23650      | 39465     | 10403    | 13669   | 0.44     | 0.35    | up        |
| sp Q5EBM0 CMPK2_HUMAN          | 4    | 0.75  | 1.68  | 0.027  | 3958       | 6669      | 1026     | 4442    | 0.26     | 0.67    | up        |
| sp P21926 CD9_HUMAN            | 10   | 0.76  | 1.69  | 0.002  | 117982     | 199535    | 20252    | 83636   | 0.17     | 0.42    | up        |
| sp P11215 ITAM_HUMAN           | 8    | 0.76  | 1.70  | 0.007  | 20077      | 34049     | 6657     | 12589   | 0.33     | 0.37    | up        |
| sp P04062 GLCM_HUMAN           | 5    | 0.77  | 1.70  | 0.000  | 27311      | 46498     | 6670     | 13928   | 0.24     | 0.30    | up        |
| sp P32321 DCTD_HUMAN           | 5    | 0.77  | 1.70  | 0.000  | 12620      | 21488     | 1462     | 7354    | 0.12     | 0.34    | up        |
| sp A0A0C4DH34 HV428_HUMAN      | 14   | 0.77  | 1.70  | 0.041  | 235302     | 400907    | 95578    | 218745  | 0.41     | 0.55    | up        |
| sp Q9H269 VPS16_HUMAN          | 3    | 0.77  | 1.70  | 0.000  | 9589       | 16344     | 820      | 5372    | 0.09     | 0.33    | up        |
| sp P09455 RET1_HUMAN           | 13   | 0.77  | 1.71  | 0.031  | 124072     | 211696    | 49761    | 130458  | 0.40     | 0.62    | up        |
| sp P17900 SAP3_HUMAN           | 6    | 0.77  | 1.71  | 0.017  | 127533     | 218128    | 84047    | 77729   | 0.66     | 0.36    | up        |
| sp P11279 LAMP1_HUMAN          | 6    | 0.78  | 1.71  | 0.000  | 84427      | 144723    | 11197    | 44335   | 0.13     | 0.31    | up        |
| sp P10253 LYAG_HUMAN           | 10   | 0.78  | 1.72  | 0.003  | 35189      | 60385     | 6554     | 27891   | 0.19     | 0.46    | up        |
| sp A0A0C4DH72 KV106_HUMAN      | 17   | 0.78  | 1.72  | 0.027  | 35791      | 61461     | 11187    | 37535   | 0.31     | 0.61    | up        |
| sp P54105 ICLN_HUMAN           | 3    | 0.79  | 1.73  | 0.005  | 3976       | 6870      | 968      | 2693    | 0.24     | 0.39    | up        |
| sp P01700 LV147_HUMAN          | 11   | 0.79  | 1.73  | 0.047  | 29239      | 50570     | 10770    | 35338   | 0.37     | 0.70    | up        |
| sp P01033 TIMP1_HUMAN          | 14   | 0.80  | 1.74  | 0.033  | 140357     | 243822    | 90394    | 107460  | 0.64     | 0.44    | up        |
| sp Q96TC7 RMD3_HUMAN           | 3    | 0.80  | 1.74  | 0.002  | 6778       | 11794     | 2103     | 3638    | 0.31     | 0.31    | up        |
| sp Q8N163 CCAR2_HUMAN          | 3    | 0.81  | 1.75  | 0.029  | 4184       | 7327      | 794      | 5496    | 0.19     | 0.75    | up        |
| sp P13688 CEAM1_HUMAN          | 7    | 0.82  | 1.76  | 0.030  | 64274      | 113145    | 16544    | 95981   | 0.26     | 0.85    | up        |
| sp P49257 LMAN1_HUMAN          | 17   | 0.82  | 1.76  | 0.001  | 59032      | 104025    | 21076    | 27159   | 0.36     | 0.26    | up        |
| sp P12107 COBA1_HUMAN          | 8    | 0.82  | 1.77  | 0.006  | 6770       | 11961     | 2154     | 5026    | 0.32     | 0.42    | up        |
| sp Q9Y394 DHRS7_HUMAN          | 3    | 0.83  | 1.77  | 0.011  | 13193      | 23400     | 4237     | 15621   | 0.32     | 0.67    | up        |
| sp O43657 TSN6_HUMAN           | 3    | 0.83  | 1.78  | 0.026  | 2607       | 4631      | 1189     | 2197    | 0.46     | 0.47    | up        |
| sp O43291 SPIT2_HUMAN          | 4    | 0.83  | 1.78  | 0.005  | 6371       | 11340     | 1403     | 5615    | 0.22     | 0.50    | up        |
| sp O94985 CSTN1_HUMAN          | 8    | 0.83  | 1.78  | 0.000  | 13751      | 24529     | 3698     | 7665    | 0.27     | 0.31    | up        |
| sp P07339 CATD_HUMAN           | 53   | 0.84  | 1.79  | 0.001  | 345864     | 619970    | 73801    | 244441  | 0.21     | 0.39    | up        |

(continued on next page)

Table A.3

(continued)

| Accession                  | PSMs | logFC | FC   | PValue | mean_short | mean_long | SD_short | SD_long | CV_short | CV_long | direction |
|----------------------------|------|-------|------|--------|------------|-----------|----------|---------|----------|---------|-----------|
| sp P14923 PLAK_HUMAN       | 35   | 0.85  | 1.80 | 0.001  | 228229     | 410904    | 74841    | 159603  | 0.33     | 0.39    | up        |
| sp P04433 KV311_HUMAN      | 22   | 0.85  | 1.80 | 0.013  | 59460      | 107101    | 22910    | 55764   | 0.39     | 0.52    | up        |
| sp P60891 PRPS1_HUMAN      | 4    | 0.86  | 1.82 | 0.000  | 22198      | 40421     | 2698     | 13062   | 0.12     | 0.32    | up        |
| sp Q9HC84 MUC5B_HUMAN      | 7    | 0.86  | 1.82 | 0.021  | 5627       | 10247     | 2832     | 4812    | 0.50     | 0.47    | up        |
| sp Q9UI42 CBPA4_HUMAN      | 4    | 0.87  | 1.82 | 0.045  | 4473       | 8150      | 2192     | 5641    | 0.49     | 0.69    | up        |
| sp P49788 TIG1_HUMAN       | 14   | 0.87  | 1.82 | 0.028  | 100750     | 183716    | 38441    | 117578  | 0.38     | 0.64    | up        |
| sp Q9NZ08 ERAP1_HUMAN      | 31   | 0.87  | 1.83 | 0.000  | 201537     | 368099    | 76046    | 90141   | 0.38     | 0.24    | up        |
| sp P01040 CYTA_HUMAN       | 12   | 0.87  | 1.83 | 0.015  | 106646     | 194786    | 47589    | 114156  | 0.45     | 0.59    | up        |
| sp P53367 ARFP1_HUMAN      | 3    | 0.87  | 1.83 | 0.000  | 4466       | 8162      | 1029     | 2572    | 0.23     | 0.32    | up        |
| sp Q9H477 RBSK_HUMAN       | 4    | 0.88  | 1.84 | 0.001  | 4442       | 8176      | 879      | 3135    | 0.20     | 0.38    | up        |
| sp A6NI72 NCF1B_HUMAN (+1) | 3    | 0.89  | 1.85 | 0.044  | 44239      | 78438     | 29228    | 52483   | 0.69     | 0.67    | up        |
| sp P05186 PPBT_HUMAN       | 23   | 0.89  | 1.86 | 0.001  | 114297     | 212289    | 52249    | 57878   | 0.46     | 0.27    | up        |
| sp P00450 CERU_HUMAN       | 252  | 0.90  | 1.86 | 0.001  | 2132715    | 3969034   | 811314   | 1059440 | 0.38     | 0.27    | up        |
| sp Q9NQ79 CRAC1_HUMAN      | 8    | 0.90  | 1.87 | 0.013  | 7720       | 14407     | 2793     | 8919    | 0.36     | 0.62    | up        |
| sp P15924 DESP_HUMAN       | 117  | 0.90  | 1.87 | 0.008  | 634671     | 1185087   | 323755   | 567783  | 0.51     | 0.48    | up        |
| sp P10619 PPGB_HUMAN       | 5    | 0.91  | 1.88 | 0.000  | 25728      | 48285     | 8762     | 16414   | 0.34     | 0.34    | up        |
| sp P51688 SPHM_HUMAN       | 4    | 0.91  | 1.88 | 0.007  | 15486      | 29064     | 4607     | 15544   | 0.30     | 0.53    | up        |
| sp Q99523 SORT_HUMAN       | 4    | 0.91  | 1.88 | 0.009  | 9246       | 17366     | 5413     | 6792    | 0.59     | 0.39    | up        |
| sp O75635 SPB7_HUMAN       | 3    | 0.91  | 1.88 | 0.012  | 4418       | 8324      | 1819     | 4809    | 0.41     | 0.58    | up        |
| sp P04066 FUCO_HUMAN       | 13   | 0.93  | 1.90 | 0.001  | 58786      | 111778    | 10757    | 56096   | 0.18     | 0.50    | up        |
| sp O60613 SEP15_HUMAN      | 3    | 0.94  | 1.92 | 0.007  | 11027      | 21169     | 1831     | 13923   | 0.17     | 0.66    | up        |
| sp O00754 MA2B1_HUMAN      | 6    | 0.94  | 1.92 | 0.000  | 29679      | 57117     | 4181     | 21422   | 0.14     | 0.38    | up        |
| sp P24592 IBP6_HUMAN       | 3    | 0.95  | 1.93 | 0.002  | 16275      | 31360     | 5621     | 16614   | 0.35     | 0.53    | up        |
| sp O00391 QSOX1_HUMAN      | 46   | 0.95  | 1.93 | 0.001  | 301254     | 580850    | 141028   | 188021  | 0.47     | 0.32    | up        |
| sp Q92896 GSLG1_HUMAN      | 44   | 0.95  | 1.93 | 0.000  | 205466     | 397571    | 59373    | 143598  | 0.29     | 0.36    | up        |
| sp P00918 CAH2_HUMAN       | 7    | 0.97  | 1.95 | 0.000  | 28415      | 55520     | 7706     | 15536   | 0.27     | 0.28    | up        |
| sp O43493 TGON2_HUMAN      | 7    | 0.97  | 1.96 | 0.008  | 6212       | 12158     | 1546     | 7828    | 0.25     | 0.64    | up        |
| sp P08962 CD63_HUMAN       | 6    | 0.97  | 1.96 | 0.000  | 43405      | 85106     | 10851    | 29358   | 0.25     | 0.34    | up        |
| sp Q9GZN4 BSSP4_HUMAN      | 6    | 0.99  | 1.98 | 0.002  | 7408       | 14695     | 2901     | 7708    | 0.39     | 0.52    | up        |
| sp P21333 FLNA_HUMAN       | 32   | 0.99  | 1.98 | 0.001  | 85924      | 170550    | 30181    | 79430   | 0.35     | 0.47    | up        |
| sp Q9HAT2 SIAE_HUMAN       | 10   | 1.00  | 1.99 | 0.000  | 34461      | 68728     | 7440     | 26148   | 0.22     | 0.38    | up        |
| sp Q14435 GALT3_HUMAN      | 8    | 1.00  | 1.99 | 0.000  | 34422      | 68652     | 4167     | 25734   | 0.12     | 0.37    | up        |
| sp P16278 BGAL_HUMAN       | 5    | 1.00  | 2.00 | 0.000  | 12985      | 25948     | 2762     | 9655    | 0.21     | 0.37    | up        |
| sp P16070 CD44_HUMAN       | 6    | 1.00  | 2.00 | 0.000  | 54429      | 108912    | 14424    | 35656   | 0.27     | 0.33    | up        |
| sp Q7Z7H5 TMED4_HUMAN      | 6    | 1.01  | 2.01 | 0.000  | 44637      | 89896     | 5247     | 26434   | 0.12     | 0.29    | up        |
| sp Q08188 TGM3_HUMAN       | 15   | 1.02  | 2.03 | 0.001  | 27361      | 55440     | 10688    | 24603   | 0.39     | 0.44    | up        |
| sp P10909 CLUS_HUMAN       | 109  | 1.03  | 2.04 | 0.002  | 929056     | 1895940   | 433416   | 849357  | 0.47     | 0.45    | up        |
| sp P17050 NAGAB_HUMAN      | 6    | 1.03  | 2.04 | 0.000  | 3324       | 6791      | 785      | 2236    | 0.24     | 0.33    | up        |
| sp P53634 CATC_HUMAN       | 13   | 1.04  | 2.05 | 0.000  | 128683     | 264064    | 30323    | 84784   | 0.24     | 0.32    | up        |
| sp Q9Y337 KLK5_HUMAN       | 4    | 1.04  | 2.05 | 0.005  | 18948      | 38886     | 9342     | 21722   | 0.49     | 0.56    | up        |
| sp Q9UBT3 DKK4_HUMAN       | 12   | 1.04  | 2.05 | 0.027  | 44521      | 91380     | 36896    | 42920   | 0.83     | 0.47    | up        |
| sp P05089 ARGH1_HUMAN      | 12   | 1.05  | 2.07 | 0.001  | 76718      | 159186    | 30769    | 81741   | 0.40     | 0.51    | up        |
| sp P15144 AMPN_HUMAN       | 41   | 1.06  | 2.08 | 0.000  | 177523     | 368962    | 71925    | 121116  | 0.41     | 0.33    | up        |
| sp P25774 CATS_HUMAN       | 14   | 1.06  | 2.08 | 0.000  | 50804      | 105728    | 17244    | 47435   | 0.34     | 0.45    | up        |
| sp Q9Y295 DRG1_HUMAN       | 4    | 1.06  | 2.08 | 0.021  | 1618       | 3368      | 551      | 1723    | 0.34     | 0.51    | up        |
| sp Q9UHL4 DPP2_HUMAN       | 12   | 1.06  | 2.09 | 0.001  | 73777      | 153857    | 20344    | 89477   | 0.28     | 0.58    | up        |
| sp P10586 PTPRF_HUMAN      | 20   | 1.06  | 2.09 | 0.000  | 13365      | 27937     | 3692     | 10718   | 0.28     | 0.38    | up        |
| sp O75629 CREG1_HUMAN      | 3    | 1.07  | 2.09 | 0.003  | 3548       | 7430      | 1312     | 4051    | 0.37     | 0.55    | up        |
| sp P21589 SNTD_HUMAN       | 11   | 1.07  | 2.10 | 0.014  | 15636      | 32879     | 5726     | 27515   | 0.37     | 0.84    | up        |
| sp Q8N4A0 GALT4_HUMAN      | 14   | 1.08  | 2.12 | 0.000  | 53064      | 112437    | 12148    | 44249   | 0.23     | 0.39    | up        |
| sp O43866 CD5L_HUMAN       | 14   | 1.09  | 2.12 | 0.000  | 22808      | 48444     | 6032     | 13764   | 0.26     | 0.28    | up        |
| sp Q01130 SRSF2_HUMAN      | 5    | 1.09  | 2.13 | 0.000  | 10615      | 22628     | 2269     | 7863    | 0.21     | 0.35    | up        |
| sp Q865F2 GALT7_HUMAN      | 25   | 1.09  | 2.14 | 0.000  | 161845     | 345647    | 40995    | 137046  | 0.25     | 0.40    | up        |
| sp P22392 NDKB_HUMAN       | 10   | 1.10  | 2.14 | 0.001  | 816988     | 1747486   | 127896   | 840822  | 0.16     | 0.48    | up        |
| sp O14657 TOR1B_HUMAN      | 4    | 1.10  | 2.14 | 0.000  | 14239      | 30465     | 3059     | 13723   | 0.21     | 0.45    | up        |
| sp P12724 ECP_HUMAN        | 4    | 1.10  | 2.15 | 0.030  | 13567      | 29114     | 7419     | 22771   | 0.55     | 0.78    | up        |
| sp Q13724 MOGS_HUMAN       | 8    | 1.10  | 2.15 | 0.000  | 11114      | 23874     | 3367     | 12639   | 0.30     | 0.53    | up        |
| sp P36222 CH3L1_HUMAN      | 7    | 1.11  | 2.16 | 0.001  | 5161       | 11138     | 2973     | 3581    | 0.58     | 0.32    | up        |
| sp Q5JWF2 GNAS1_HUMAN      | 5    | 1.12  | 2.17 | 0.001  | 27102      | 58850     | 6356     | 42510   | 0.23     | 0.72    | up        |
| sp P08240 SRPRA_HUMAN      | 8    | 1.12  | 2.18 | 0.000  | 28649      | 62359     | 5608     | 20691   | 0.20     | 0.33    | up        |
| sp Q14766 LTBP1_HUMAN      | 11   | 1.13  | 2.19 | 0.000  | 10104      | 22113     | 3340     | 8166    | 0.33     | 0.37    | up        |
| sp Q15166 PON3_HUMAN       | 3    | 1.13  | 2.19 | 0.005  | 7532       | 16489     | 3287     | 8884    | 0.44     | 0.54    | up        |
| sp Q10472 GALT1_HUMAN      | 6    | 1.13  | 2.20 | 0.000  | 13007      | 28559     | 3017     | 9060    | 0.23     | 0.32    | up        |
| sp Q5T749 KPRP_HUMAN       | 7    | 1.14  | 2.20 | 0.000  | 11549      | 25381     | 3806     | 12214   | 0.33     | 0.48    | up        |
| sp O95793 STAU1_HUMAN      | 7    | 1.14  | 2.20 | 0.000  | 25741      | 56690     | 4846     | 17452   | 0.19     | 0.31    | up        |
| sp Q7Z2W4 ZCCHV_HUMAN      | 3    | 1.14  | 2.20 | 0.000  | 19015      | 41885     | 9139     | 14889   | 0.48     | 0.36    | up        |
| sp P15309 PPAP_HUMAN       | 10   | 1.14  | 2.20 | 0.000  | 47426      | 104527    | 11017    | 39333   | 0.23     | 0.38    | up        |
| sp Q9BTY2 FUCO2_HUMAN      | 12   | 1.14  | 2.20 | 0.000  | 51235      | 112949    | 12965    | 48444   | 0.25     | 0.43    | up        |
| sp Q9Y662 HS3SB_HUMAN (+1) | 3    | 1.15  | 2.21 | 0.000  | 4948       | 10948     | 970      | 4128    | 0.20     | 0.38    | up        |
| sp Q14697 GANAB_HUMAN      | 84   | 1.15  | 2.22 | 0.000  | 612672     | 1357078   | 128849   | 492640  | 0.21     | 0.36    | up        |
| sp Q9NZP8 C1RL_HUMAN       | 9    | 1.15  | 2.22 | 0.000  | 30745      | 68110     | 10224    | 27498   | 0.33     | 0.40    | up        |
| sp P07996 TSP1_HUMAN       | 44   | 1.15  | 2.22 | 0.001  | 125875     | 279476    | 51428    | 149226  | 0.41     | 0.53    | up        |
| sp O15439 MRP4_HUMAN       | 5    | 1.15  | 2.23 | 0.000  | 6019       | 13393     | 1187     | 8282    | 0.20     | 0.62    | up        |
| sp Q9Y4L1 HYOU1_HUMAN      | 46   | 1.15  | 2.23 | 0.000  | 203039     | 452107    | 50930    | 165486  | 0.25     | 0.37    | up        |
| sp Q8NFL0 B3GN7_HUMAN      | 6    | 1.16  | 2.23 | 0.002  | 29422      | 65635     | 17335    | 33035   | 0.59     | 0.50    | up        |
| sp Q04609 FOLH1_HUMAN      | 20   | 1.17  | 2.25 | 0.001  | 99285      | 223740    | 21117    | 165161  | 0.21     | 0.74    | up        |

(continued on next page)

Table A.3

(continued)

| Accession                  | PSMs | logFC | FC   | PValue | mean_short | mean_long | SD_short | SD_long | CV_short | CV_long | direction |
|----------------------------|------|-------|------|--------|------------|-----------|----------|---------|----------|---------|-----------|
| sp Q11517 CDSN_HUMAN       | 7    | 1.18  | 2.26 | 0.001  | 16118      | 36466     | 8597     | 18897   | 0.53     | 0.52    | up        |
| sp Q12841 FSTL1_HUMAN      | 5    | 1.18  | 2.27 | 0.001  | 6840       | 15539     | 1893     | 10028   | 0.28     | 0.65    | up        |
| sp Q9UKY7 CDV3_HUMAN       | 7    | 1.18  | 2.27 | 0.009  | 15883      | 36097     | 4975     | 38868   | 0.31     | 1.08    | up        |
| sp P09237 MMP7_HUMAN       | 8    | 1.19  | 2.28 | 0.000  | 43045      | 97959     | 9005     | 50856   | 0.21     | 0.52    | up        |
| sp P11717 MPRI_HUMAN       | 18   | 1.19  | 2.28 | 0.000  | 19831      | 45153     | 7924     | 14846   | 0.40     | 0.33    | up        |
| sp Q9UN19 DAPP1_HUMAN      | 3    | 1.19  | 2.28 | 0.002  | 2499       | 5695      | 849      | 3557    | 0.34     | 0.62    | up        |
| sp Q93100 KPBB_HUMAN       | 5    | 1.19  | 2.28 | 0.000  | 20855      | 47557     | 5626     | 20023   | 0.27     | 0.42    | up        |
| sp Q8NES3 LFNG_HUMAN       | 8    | 1.19  | 2.29 | 0.000  | 17320      | 39647     | 3835     | 11699   | 0.22     | 0.30    | up        |
| sp P61225 RAP2B_HUMAN      | 3    | 1.20  | 2.29 | 0.002  | 2722       | 6236      | 1379     | 3360    | 0.51     | 0.54    | up        |
| sp Q60568 PLOD3_HUMAN      | 6    | 1.20  | 2.29 | 0.000  | 8187       | 18783     | 2533     | 8542    | 0.31     | 0.45    | up        |
| sp Q75153 CLU_HUMAN        | 5    | 1.20  | 2.30 | 0.003  | 13188      | 30300     | 1312     | 29837   | 0.10     | 0.98    | up        |
| sp Q75888 TNF13_HUMAN      | 3    | 1.20  | 2.30 | 0.000  | 21275      | 49000     | 2582     | 24052   | 0.12     | 0.49    | up        |
| sp Q8WWY8 LIPH_HUMAN       | 5    | 1.21  | 2.31 | 0.000  | 11037      | 25456     | 3599     | 11688   | 0.33     | 0.46    | up        |
| sp Q02413 DSG1_HUMAN       | 21   | 1.21  | 2.31 | 0.012  | 88434      | 204257    | 66927    | 159174  | 0.76     | 0.78    | up        |
| sp P0DTE7 AMY1B_HUMAN (+2) | 50   | 1.22  | 2.32 | 0.003  | 450720     | 1046365   | 225225   | 470567  | 0.50     | 0.45    | up        |
| sp Q7Z6J0 SH3R1_HUMAN      | 3    | 1.22  | 2.33 | 0.000  | 7843       | 18303     | 2902     | 3727    | 0.37     | 0.20    | up        |
| sp P43251 BTD_HUMAN        | 13   | 1.23  | 2.35 | 0.000  | 129099     | 303663    | 42223    | 142931  | 0.33     | 0.47    | up        |
| sp P61916 NPC2_HUMAN       | 20   | 1.24  | 2.36 | 0.000  | 152162     | 358561    | 40805    | 178349  | 0.27     | 0.50    | up        |
| sp Q9Y6W3 CAN7_HUMAN       | 6    | 1.24  | 2.36 | 0.000  | 4030       | 9503      | 1228     | 4679    | 0.30     | 0.49    | up        |
| sp Q60513 B4GT4_HUMAN      | 3    | 1.24  | 2.36 | 0.000  | 8911       | 21057     | 2580     | 8645    | 0.29     | 0.41    | up        |
| sp P17405 ASM_HUMAN        | 3    | 1.24  | 2.37 | 0.000  | 8481       | 20078     | 2118     | 7559    | 0.25     | 0.38    | up        |
| sp Q5JRA6 TGO1_HUMAN       | 4    | 1.25  | 2.37 | 0.014  | 1748       | 4148      | 922      | 1573    | 0.53     | 0.38    | up        |
| sp Q96SW2 CRBN_HUMAN       | 3    | 1.25  | 2.38 | 0.000  | 4082       | 9704      | 818      | 4052    | 0.20     | 0.42    | up        |
| sp P0DJ18 SAA1_HUMAN       | 4    | 1.25  | 2.38 | 0.001  | 12258      | 29214     | 6130     | 14598   | 0.50     | 0.50    | up        |
| sp P05090 APOD_HUMAN       | 34   | 1.26  | 2.39 | 0.024  | 165460     | 395334    | 152550   | 274688  | 0.92     | 0.69    | up        |
| sp P33908 MA1A1_HUMAN      | 11   | 1.26  | 2.39 | 0.002  | 82179      | 196501    | 39144    | 141911  | 0.48     | 0.72    | up        |
| sp Q9Y2C3 B3GT5_HUMAN      | 6    | 1.26  | 2.40 | 0.000  | 20208      | 48505     | 3310     | 35457   | 0.16     | 0.73    | up        |
| sp Q00115 DNS2A_HUMAN      | 6    | 1.26  | 2.40 | 0.000  | 21688      | 52114     | 6679     | 20778   | 0.31     | 0.40    | up        |
| sp Q14773 TPP1_HUMAN       | 20   | 1.27  | 2.41 | 0.000  | 82586      | 199087    | 15401    | 89769   | 0.19     | 0.45    | up        |
| sp Q9Y6E0 STK24_HUMAN      | 7    | 1.28  | 2.42 | 0.000  | 17817      | 43199     | 6455     | 20589   | 0.36     | 0.48    | up        |
| sp Q9NQ84 GPC5C_HUMAN      | 6    | 1.28  | 2.43 | 0.000  | 12354      | 29963     | 5896     | 12057   | 0.48     | 0.40    | up        |
| sp Q96BQ1 FAM3D_HUMAN      | 9    | 1.28  | 2.43 | 0.000  | 27369      | 66414     | 7485     | 36922   | 0.27     | 0.56    | up        |
| sp P40199 CEAM6_HUMAN      | 13   | 1.28  | 2.43 | 0.000  | 262694     | 639531    | 69209    | 285816  | 0.26     | 0.45    | up        |
| sp Q5JSH3 WDR44_HUMAN      | 3    | 1.28  | 2.44 | 0.000  | 14371      | 35015     | 6746     | 11603   | 0.47     | 0.33    | up        |
| sp Q43490 PROM1_HUMAN      | 24   | 1.29  | 2.44 | 0.000  | 83187      | 203048    | 34539    | 122483  | 0.42     | 0.60    | up        |
| sp P15289 ARSA_HUMAN       | 8    | 1.29  | 2.45 | 0.001  | 11912      | 29190     | 5233     | 18104   | 0.44     | 0.62    | up        |
| sp Q5SGD2 PPM1L_HUMAN      | 5    | 1.30  | 2.47 | 0.001  | 7095       | 17517     | 1718     | 13616   | 0.24     | 0.78    | up        |
| sp P06865 HEXA_HUMAN       | 15   | 1.30  | 2.47 | 0.000  | 61350      | 151539    | 19524    | 82709   | 0.32     | 0.55    | up        |
| sp Q9HBR0 S38AA_HUMAN      | 7    | 1.31  | 2.47 | 0.004  | 6317       | 15610     | 4594     | 9491    | 0.73     | 0.61    | up        |
| sp P40818 UBP8_HUMAN       | 3    | 1.31  | 2.49 | 0.004  | 4730       | 11766     | 2560     | 8428    | 0.54     | 0.72    | up        |
| sp Q96P63 SPB12_HUMAN      | 12   | 1.32  | 2.49 | 0.000  | 42183      | 104957    | 16708    | 53334   | 0.40     | 0.51    | up        |
| sp Q9UBR2 CATZ_HUMAN       | 6    | 1.32  | 2.49 | 0.000  | 51619      | 128600    | 17541    | 47206   | 0.34     | 0.37    | up        |
| sp Q15293 RCN1_HUMAN       | 33   | 1.32  | 2.49 | 0.000  | 200890     | 500693    | 25168    | 209362  | 0.13     | 0.42    | up        |
| sp Q13421 MSLN_HUMAN       | 75   | 1.32  | 2.49 | 0.001  | 1717903    | 4281750   | 787743   | 2346185 | 0.46     | 0.55    | up        |
| sp P16035 TIMP2_HUMAN      | 15   | 1.32  | 2.50 | 0.000  | 46671      | 116653    | 14287    | 64485   | 0.31     | 0.55    | up        |
| sp Q95967 FBLN4_HUMAN      | 4    | 1.33  | 2.51 | 0.000  | 1713       | 4302      | 657      | 2110    | 0.38     | 0.49    | up        |
| sp P54802 ANAG_HUMAN       | 10   | 1.33  | 2.51 | 0.000  | 27379      | 68787     | 7152     | 23592   | 0.26     | 0.34    | up        |
| sp P26572 MGAT1_HUMAN      | 11   | 1.33  | 2.52 | 0.000  | 50918      | 128113    | 22514    | 47841   | 0.44     | 0.37    | up        |
| sp P07686 HEXB_HUMAN       | 22   | 1.34  | 2.53 | 0.000  | 154630     | 391289    | 48613    | 167850  | 0.31     | 0.43    | up        |
| sp Q16769 QPCT_HUMAN       | 7    | 1.35  | 2.54 | 0.000  | 28353      | 72141     | 8569     | 31881   | 0.30     | 0.44    | up        |
| sp P16144 ITB4_HUMAN       | 4    | 1.35  | 2.55 | 0.049  | 1570       | 4008      | 832      | 6496    | 0.53     | 1.62    | up        |
| sp Q75976 CBPD_HUMAN       | 10   | 1.36  | 2.57 | 0.000  | 20031      | 51481     | 7117     | 19172   | 0.36     | 0.37    | up        |
| sp Q8NB7 SUMF2_HUMAN       | 7    | 1.36  | 2.57 | 0.000  | 43049      | 110838    | 7482     | 64070   | 0.17     | 0.58    | up        |
| sp Q92520 FAM3C_HUMAN      | 7    | 1.36  | 2.58 | 0.000  | 20506      | 52812     | 5525     | 26811   | 0.27     | 0.51    | up        |
| sp P14314 GLU2B_HUMAN      | 29   | 1.37  | 2.58 | 0.000  | 140380     | 362029    | 26748    | 141685  | 0.19     | 0.39    | up        |
| sp Q14656 TOR1A_HUMAN      | 3    | 1.37  | 2.58 | 0.001  | 3531       | 9121      | 1283     | 6682    | 0.36     | 0.73    | up        |
| sp P60033 CD81_HUMAN       | 4    | 1.37  | 2.59 | 0.000  | 7693       | 19925     | 2747     | 4105    | 0.36     | 0.21    | up        |
| sp Q9UGM3 DMBT1_HUMAN      | 578  | 1.37  | 2.59 | 0.002  | 2514580    | 6515970   | 1032182  | 5511229 | 0.41     | 0.85    | up        |
| sp P15907 SIAT1_HUMAN      | 11   | 1.38  | 2.60 | 0.000  | 37897      | 98639     | 14172    | 33881   | 0.37     | 0.34    | up        |
| sp P02649 APOE_HUMAN       | 28   | 1.39  | 2.62 | 0.000  | 164595     | 430592    | 57058    | 125933  | 0.35     | 0.29    | up        |
| sp P50591 TNF10_HUMAN      | 12   | 1.40  | 2.63 | 0.000  | 34810      | 91709     | 12917    | 36091   | 0.37     | 0.39    | up        |
| sp A0A0B4J1V0 HV315_HUMAN  | 14   | 1.40  | 2.64 | 0.008  | 64961      | 171778    | 30104    | 162883  | 0.46     | 0.95    | up        |
| sp Q16706 MA2A1_HUMAN      | 14   | 1.41  | 2.65 | 0.000  | 43467      | 115292    | 15071    | 61965   | 0.35     | 0.54    | up        |
| sp Q8IVD9 NUDC3_HUMAN      | 3    | 1.41  | 2.65 | 0.036  | 525        | 1393      | 447      | 1058    | 0.85     | 0.76    | up        |
| sp P21741 MK_HUMAN         | 10   | 1.41  | 2.66 | 0.002  | 45936      | 122211    | 27098    | 100096  | 0.59     | 0.82    | up        |
| sp Q77M9 GALT5_HUMAN       | 18   | 1.41  | 2.67 | 0.000  | 69639      | 185658    | 25204    | 93013   | 0.36     | 0.50    | up        |
| sp Q13232 NDK3_HUMAN       | 10   | 1.42  | 2.68 | 0.000  | 46884      | 125626    | 9605     | 46295   | 0.20     | 0.37    | up        |
| sp Q9GZM7 TINAL_HUMAN      | 9    | 1.43  | 2.69 | 0.000  | 17708      | 47624     | 8129     | 14362   | 0.46     | 0.30    | up        |
| sp Q9Y2E5 MA2B2_HUMAN      | 3    | 1.43  | 2.69 | 0.000  | 4433       | 11941     | 1669     | 6186    | 0.38     | 0.52    | up        |
| sp Q13835 PKP1_HUMAN       | 8    | 1.43  | 2.69 | 0.000  | 8515       | 22937     | 3542     | 11231   | 0.42     | 0.49    | up        |
| sp Q95395 GNT3_HUMAN       | 11   | 1.43  | 2.70 | 0.000  | 66208      | 178435    | 40849    | 62683   | 0.62     | 0.35    | up        |
| sp P23490 LORI_HUMAN       | 3    | 1.43  | 2.70 | 0.000  | 13931      | 37549     | 5813     | 16639   | 0.42     | 0.44    | up        |
| sp P13866 SC5A1_HUMAN      | 5    | 1.43  | 2.70 | 0.001  | 5259       | 14182     | 2171     | 13382   | 0.41     | 0.94    | up        |
| sp P08571 CD14_HUMAN       | 20   | 1.43  | 2.70 | 0.000  | 170746     | 461166    | 56591    | 214307  | 0.33     | 0.46    | up        |
| sp P31944 CASPE_HUMAN      | 17   | 1.44  | 2.71 | 0.002  | 96906      | 262780    | 60799    | 207640  | 0.63     | 0.79    | up        |
| sp Q96EU7 C1GLC_HUMAN      | 8    | 1.44  | 2.71 | 0.000  | 38937      | 105672    | 12978    | 41357   | 0.33     | 0.39    | up        |

(continued on next page)

Table A.3

(continued)

| Accession             | PSMs | logFC | FC   | PValue | mean_short | mean_long | SD_short | SD_long   | CV_short | CV_long | direction |
|-----------------------|------|-------|------|--------|------------|-----------|----------|-----------|----------|---------|-----------|
| sp Q99935 PROL1_HUMAN | 51   | 1.44  | 2.72 | 0.017  | 791475     | 2150059   | 908090   | 1160766   | 1.15     | 0.54    | up        |
| sp P51993 FUT6_HUMAN  | 4    | 1.45  | 2.73 | 0.000  | 7626       | 20823     | 2788     | 13659     | 0.37     | 0.66    | up        |
| sp Q16270 IBP7_HUMAN  | 7    | 1.45  | 2.73 | 0.000  | 44600      | 121791    | 19131    | 64671     | 0.43     | 0.53    | up        |
| sp Q99519 NEUR1_HUMAN | 11   | 1.45  | 2.73 | 0.000  | 27906      | 76320     | 9589     | 35960     | 0.34     | 0.47    | up        |
| sp Q06828 FMOD_HUMAN  | 12   | 1.45  | 2.74 | 0.000  | 34544      | 94603     | 16612    | 50399     | 0.48     | 0.53    | up        |
| sp P20062 TCO2_HUMAN  | 5    | 1.47  | 2.76 | 0.000  | 15650      | 43245     | 5571     | 22601     | 0.36     | 0.52    | up        |
| sp P15291 B4GT1_HUMAN | 10   | 1.47  | 2.78 | 0.000  | 68461      | 190187    | 20793    | 88897     | 0.30     | 0.47    | up        |
| sp P09668 CATH_HUMAN  | 12   | 1.49  | 2.81 | 0.000  | 137778     | 387091    | 62159    | 192914    | 0.45     | 0.50    | up        |
| sp O00560 SDCB1_HUMAN | 11   | 1.49  | 2.81 | 0.000  | 35762      | 100510    | 14491    | 57669     | 0.41     | 0.57    | up        |
| sp P01034 CYTC_HUMAN  | 45   | 1.49  | 2.82 | 0.000  | 516163     | 1453298   | 439091   | 467925    | 0.85     | 0.32    | up        |
| sp Q15782 CH3L2_HUMAN | 25   | 1.50  | 2.83 | 0.001  | 271042     | 767953    | 133044   | 432518    | 0.49     | 0.56    | up        |
| sp O43505 B4GA1_HUMAN | 7    | 1.51  | 2.84 | 0.000  | 23470      | 66667     | 6446     | 34007     | 0.27     | 0.51    | up        |
| sp Q9GZZ8 LACRT_HUMAN | 105  | 1.51  | 2.84 | 0.002  | 12549765   | 35686160  | 8128507  | 24562203  | 0.65     | 0.69    | up        |
| sp P01036 CYTS_HUMAN  | 171  | 1.51  | 2.85 | 0.000  | 697686     | 1986288   | 420767   | 765334    | 0.60     | 0.39    | up        |
| sp O00264 PGRC1_HUMAN | 3    | 1.51  | 2.85 | 0.000  | 6092       | 17355     | 1415     | 11861     | 0.23     | 0.68    | up        |
| sp P45877 PPIC_HUMAN  | 8    | 1.52  | 2.86 | 0.000  | 58883      | 168289    | 17750    | 101628    | 0.30     | 0.60    | up        |
| sp P19021 AMD_HUMAN   | 15   | 1.52  | 2.87 | 0.000  | 59416      | 170397    | 22418    | 71649     | 0.38     | 0.42    | up        |
| sp P20933 ASPG_HUMAN  | 7    | 1.52  | 2.87 | 0.000  | 10439      | 30000     | 3535     | 20222     | 0.34     | 0.67    | up        |
| sp P06280 AGAL_HUMAN  | 6    | 1.53  | 2.89 | 0.000  | 5005       | 14447     | 2168     | 6949      | 0.43     | 0.48    | up        |
| sp O75787 RENH_HUMAN  | 5    | 1.57  | 2.96 | 0.000  | 24604      | 72936     | 7584     | 33421     | 0.31     | 0.46    | up        |
| sp Q8TAX7 MUC7_HUMAN  | 7    | 1.57  | 2.97 | 0.003  | 78010      | 231350    | 51415    | 188400    | 0.66     | 0.81    | up        |
| sp P50897 PPT1_HUMAN  | 7    | 1.57  | 2.97 | 0.000  | 27136      | 80533     | 7021     | 44986     | 0.26     | 0.56    | up        |
| sp Q86X29 LSR_HUMAN   | 20   | 1.57  | 2.98 | 0.000  | 50101      | 149066    | 20220    | 68849     | 0.40     | 0.46    | up        |
| sp Q15041 SEM3E_HUMAN | 12   | 1.58  | 2.99 | 0.000  | 28953      | 86462     | 9917     | 46307     | 0.34     | 0.54    | up        |
| sp Q02487 DSC2_HUMAN  | 5    | 1.59  | 3.01 | 0.000  | 25709      | 77332     | 9832     | 39534     | 0.38     | 0.51    | up        |
| sp P12830 CADH1_HUMAN | 20   | 1.60  | 3.03 | 0.000  | 117183     | 355328    | 40794    | 148145    | 0.35     | 0.42    | up        |
| sp Q14515 SPRL1_HUMAN | 43   | 1.60  | 3.03 | 0.000  | 317659     | 963904    | 172876   | 299159    | 0.54     | 0.31    | up        |
| sp Q96596 PEBP4_HUMAN | 14   | 1.61  | 3.04 | 0.000  | 479705     | 1460336   | 186728   | 963234    | 0.39     | 0.66    | up        |
| sp Q8IWU5 SULF2_HUMAN | 8    | 1.61  | 3.06 | 0.000  | 29015      | 88792     | 12851    | 54130     | 0.44     | 0.61    | up        |
| sp P28799 GRN_HUMAN   | 21   | 1.62  | 3.07 | 0.000  | 210658     | 646158    | 79443    | 551525    | 0.38     | 0.85    | up        |
| sp P22352 GPX3_HUMAN  | 11   | 1.62  | 3.08 | 0.000  | 63864      | 196593    | 24278    | 87430     | 0.38     | 0.44    | up        |
| sp Q9UNW1 MINP1_HUMAN | 11   | 1.63  | 3.09 | 0.000  | 54520      | 168731    | 18951    | 90596     | 0.35     | 0.54    | up        |
| sp Q8WVQ1 CANT1_HUMAN | 9    | 1.63  | 3.10 | 0.000  | 46405      | 143783    | 21818    | 94890     | 0.47     | 0.66    | up        |
| sp Q8NBJ4 GOLM1_HUMAN | 29   | 1.63  | 3.10 | 0.000  | 169581     | 526026    | 53261    | 243358    | 0.31     | 0.46    | up        |
| sp P20061 TCO1_HUMAN  | 101  | 1.63  | 3.10 | 0.000  | 1091808    | 3388691   | 499410   | 2508065   | 0.46     | 0.74    | up        |
| sp Q4KMQ2 ANO6_HUMAN  | 5    | 1.64  | 3.11 | 0.002  | 6262       | 19451     | 2345     | 24635     | 0.37     | 1.27    | up        |
| sp Q9H173 SIL1_HUMAN  | 14   | 1.64  | 3.11 | 0.000  | 71074      | 221384    | 43842    | 66994     | 0.62     | 0.30    | up        |
| sp Q8NCH0 CHSTE_HUMAN | 3    | 1.66  | 3.16 | 0.000  | 2377       | 7510      | 406      | 3741      | 0.17     | 0.50    | up        |
| sp Q14050 CO9A3_HUMAN | 9    | 1.66  | 3.16 | 0.001  | 14240      | 45064     | 9897     | 27530     | 0.69     | 0.61    | up        |
| sp P12931 SRC_HUMAN   | 4    | 1.66  | 3.17 | 0.019  | 3475       | 11017     | 867      | 18344     | 0.25     | 1.67    | up        |
| sp Q92820 GGH_HUMAN   | 4    | 1.67  | 3.17 | 0.000  | 40105      | 127230    | 12666    | 82167     | 0.32     | 0.65    | up        |
| sp P61769 B2MG_HUMAN  | 38   | 1.67  | 3.18 | 0.000  | 447608     | 1423211   | 255938   | 740603    | 0.57     | 0.52    | up        |
| sp O75503 CLN5_HUMAN  | 6    | 1.67  | 3.18 | 0.000  | 59363      | 188913    | 22968    | 122231    | 0.39     | 0.65    | up        |
| sp P14555 PA2GA_HUMAN | 130  | 1.67  | 3.19 | 0.000  | 3131419    | 9994110   | 2260554  | 4157828   | 0.72     | 0.42    | up        |
| sp Q08380 LG3BP_HUMAN | 73   | 1.68  | 3.21 | 0.000  | 540635     | 1733318   | 232571   | 859455    | 0.43     | 0.50    | up        |
| sp Q16378 PROL4_HUMAN | 71   | 1.68  | 3.21 | 0.020  | 4223305    | 13544435  | 4914916  | 14254993  | 1.16     | 1.05    | up        |
| sp P07858 CATB_HUMAN  | 49   | 1.68  | 3.21 | 0.000  | 463614     | 1487861   | 154599   | 1002083   | 0.33     | 0.67    | up        |
| sp Q9Y646 CBPQ_HUMAN  | 11   | 1.69  | 3.22 | 0.000  | 37031      | 119080    | 11665    | 44894     | 0.32     | 0.38    | up        |
| sp P34096 RNAS4_HUMAN | 16   | 1.70  | 3.25 | 0.000  | 435081     | 1411986   | 185985   | 665233    | 0.43     | 0.47    | up        |
| sp Q11201 SIA4A_HUMAN | 10   | 1.71  | 3.26 | 0.000  | 54429      | 177519    | 24784    | 75278     | 0.46     | 0.42    | up        |
| sp Q01459 DIAC_HUMAN  | 11   | 1.71  | 3.26 | 0.000  | 98269      | 320518    | 40578    | 148929    | 0.41     | 0.46    | up        |
| sp Q9UM07 PADI4_HUMAN | 6    | 1.71  | 3.27 | 0.018  | 2615       | 8558      | 2254     | 7515      | 0.86     | 0.88    | up        |
| sp Q08431 MFGM_HUMAN  | 39   | 1.71  | 3.27 | 0.000  | 184138     | 602828    | 90499    | 245739    | 0.49     | 0.41    | up        |
| sp Q86Y38 XYLT1_HUMAN | 5    | 1.71  | 3.27 | 0.000  | 11122      | 36411     | 4064     | 24584     | 0.37     | 0.68    | up        |
| sp Q86YZ3 HORN_HUMAN  | 8    | 1.72  | 3.29 | 0.012  | 1022       | 3364      | 839      | 2835      | 0.82     | 0.84    | up        |
| sp Q9H8J5 MANS1_HUMAN | 3    | 1.72  | 3.30 | 0.000  | 2621       | 8641      | 831      | 9460      | 0.32     | 1.09    | up        |
| sp Q14118 DAG1_HUMAN  | 11   | 1.73  | 3.31 | 0.000  | 74759      | 247815    | 25411    | 136816    | 0.34     | 0.55    | up        |
| sp P48723 HSP13_HUMAN | 11   | 1.74  | 3.34 | 0.000  | 40086      | 133778    | 17941    | 64116     | 0.45     | 0.48    | up        |
| sp P12273 PIP_HUMAN   | 514  | 1.74  | 3.34 | 0.000  | 15010691   | 50129511  | 9226837  | 16291842  | 0.61     | 0.32    | up        |
| sp P12645 BMP3_HUMAN  | 4    | 1.74  | 3.35 | 0.000  | 6030       | 20196     | 1698     | 18346     | 0.28     | 0.91    | up        |
| sp Q13162 PRDX4_HUMAN | 14   | 1.76  | 3.39 | 0.000  | 66916      | 226739    | 27524    | 82957     | 0.41     | 0.37    | up        |
| sp Q8WXG9 AGRV1_HUMAN | 3    | 1.76  | 3.39 | 0.005  | 14481      | 49126     | 14256    | 27361     | 0.98     | 0.56    | up        |
| sp P35475 IDUA_HUMAN  | 5    | 1.77  | 3.40 | 0.000  | 7460       | 25387     | 2808     | 11550     | 0.38     | 0.45    | up        |
| sp Q15375 EPA7_HUMAN  | 3    | 1.77  | 3.42 | 0.000  | 3400       | 11618     | 976      | 6136      | 0.29     | 0.53    | up        |
| sp P02788 TRFL_HUMAN  | 3706 | 1.78  | 3.42 | 0.000  | 114945168  | 393460755 | 57418908 | 201361732 | 0.50     | 0.51    | up        |
| sp Q02818 NUCB1_HUMAN | 29   | 1.78  | 3.43 | 0.000  | 110822     | 380068    | 38672    | 234619    | 0.35     | 0.62    | up        |
| sp Q95841 ANGL1_HUMAN | 15   | 1.78  | 3.43 | 0.000  | 73303      | 251559    | 36637    | 128800    | 0.50     | 0.51    | up        |
| sp Q9UHD0 IL19_HUMAN  | 3    | 1.78  | 3.44 | 0.000  | 25956      | 89237     | 13174    | 45015     | 0.51     | 0.50    | up        |
| sp Q13438 OS9_HUMAN   | 28   | 1.79  | 3.46 | 0.000  | 54065      | 186883    | 32095    | 80282     | 0.59     | 0.43    | up        |
| sp Q5XXA6 ANO1_HUMAN  | 12   | 1.79  | 3.46 | 0.000  | 52889      | 182952    | 19625    | 192909    | 0.37     | 1.05    | up        |
| sp Q92743 HTRA1_HUMAN | 30   | 1.79  | 3.46 | 0.000  | 141505     | 489701    | 67167    | 242003    | 0.47     | 0.49    | up        |
| sp Q96MK3 FA20A_HUMAN | 7    | 1.79  | 3.46 | 0.000  | 11690      | 40505     | 4799     | 20345     | 0.41     | 0.50    | up        |
| sp Q95968 SG1D1_HUMAN | 127  | 1.80  | 3.48 | 0.001  | 1951395    | 6788253   | 1346841  | 4121333   | 0.69     | 0.61    | up        |
| sp Q95084 PRS23_HUMAN | 7    | 1.80  | 3.49 | 0.000  | 20634      | 71953     | 8024     | 44548     | 0.39     | 0.62    | up        |
| sp Q13217 DNJC3_HUMAN | 60   | 1.80  | 3.49 | 0.000  | 340495     | 1189610   | 202968   | 564516    | 0.60     | 0.47    | up        |
| sp Q8N474 SFRP1_HUMAN | 44   | 1.81  | 3.50 | 0.000  | 760107     | 2657660   | 295280   | 2056785   | 0.39     | 0.77    | up        |

(continued on next page)

**Table A.3**

(continued)

| Accession                   | PSMs | logFC | FC     | PValue | mean_short | mean_long | SD_short | SD_long   | CV_short | CV_long | direction |
|-----------------------------|------|-------|--------|--------|------------|-----------|----------|-----------|----------|---------|-----------|
| sp P07602 SAP_HUMAN         | 56   | 1.81  | 3.50   | 0.000  | 971809     | 3398532   | 501805   | 2304753   | 0.52     | 0.68    | up        |
| sp Q9BRK5 CAB45_HUMAN       | 17   | 1.81  | 3.51   | 0.000  | 126130     | 443317    | 46421    | 258555    | 0.37     | 0.58    | up        |
| sp P25311 ZA2G_HUMAN        | 499  | 1.82  | 3.52   | 0.000  | 12010383   | 42318551  | 5491790  | 15839132  | 0.46     | 0.37    | up        |
| sp P49458 SRP09_HUMAN       | 7    | 1.82  | 3.53   | 0.002  | 58167      | 205240    | 26500    | 226948    | 0.46     | 1.11    | up        |
| sp O00462 MANBA_HUMAN       | 25   | 1.82  | 3.53   | 0.000  | 94413      | 333218    | 24695    | 169102    | 0.26     | 0.51    | up        |
| sp Q02809 PLOD1_HUMAN       | 31   | 1.82  | 3.53   | 0.000  | 113013     | 399175    | 38617    | 192830    | 0.34     | 0.48    | up        |
| sp P30533 AMRP_HUMAN        | 4    | 1.84  | 3.57   | 0.005  | 10058      | 35942     | 1206     | 62509     | 0.12     | 1.74    | up        |
| sp Q13444 ADA15_HUMAN       | 3    | 1.84  | 3.57   | 0.000  | 5722       | 20453     | 1898     | 9683      | 0.33     | 0.47    | up        |
| sp P84243 H33_HUMAN         | 3    | 1.85  | 3.60   | 0.005  | 6327       | 22774     | 2332     | 37891     | 0.37     | 1.66    | up        |
| sp Q14393 GAS6_HUMAN        | 12   | 1.85  | 3.61   | 0.000  | 19174      | 69166     | 6301     | 38213     | 0.33     | 0.55    | up        |
| sp Q9NRJ3 CCL28_HUMAN       | 4    | 1.86  | 3.62   | 0.000  | 62147      | 224944    | 38032    | 169646    | 0.61     | 0.75    | up        |
| sp P6PCB0 VWA1_HUMAN        | 10   | 1.86  | 3.63   | 0.000  | 60389      | 219072    | 22232    | 113334    | 0.37     | 0.52    | up        |
| sp P03950 ANGI_HUMAN        | 11   | 1.86  | 3.63   | 0.000  | 130173     | 472772    | 55448    | 253618    | 0.43     | 0.54    | up        |
| sp O43852 CALU_HUMAN        | 34   | 1.86  | 3.63   | 0.000  | 269575     | 979546    | 96886    | 558636    | 0.36     | 0.57    | up        |
| sp P41214 EIF2D_HUMAN       | 4    | 1.86  | 3.63   | 0.005  | 989        | 3594      | 758      | 2789      | 0.77     | 0.78    | up        |
| sp Q99574 NEUS_HUMAN        | 20   | 1.87  | 3.64   | 0.000  | 103235     | 376250    | 46786    | 150888    | 0.45     | 0.40    | up        |
| sp Q99538 LGMN_HUMAN        | 9    | 1.87  | 3.66   | 0.000  | 16736      | 61178     | 7114     | 30668     | 0.43     | 0.50    | up        |
| sp Q13296 SG2A2_HUMAN       | 4    | 1.89  | 3.70   | 0.007  | 25605      | 94648     | 19361    | 150142    | 0.76     | 1.59    | up        |
| sp O75094 SLIT3_HUMAN       | 32   | 1.89  | 3.70   | 0.000  | 60621      | 224225    | 25672    | 166454    | 0.42     | 0.74    | up        |
| sp O43405 COCH_HUMAN        | 9    | 1.90  | 3.73   | 0.000  | 39372      | 146670    | 12021    | 79959     | 0.31     | 0.55    | up        |
| sp Q9Y2I8 WDR37_HUMAN       | 3    | 1.90  | 3.74   | 0.002  | 5431       | 20308     | 788      | 33457     | 0.15     | 1.65    | up        |
| sp Q8NCL4 GALT6_HUMAN       | 17   | 1.91  | 3.75   | 0.000  | 50586      | 189664    | 16663    | 112883    | 0.33     | 0.60    | up        |
| sp P27487 DPP4_HUMAN        | 25   | 1.91  | 3.77   | 0.000  | 163788     | 617059    | 62270    | 500755    | 0.38     | 0.81    | up        |
| sp O00584 RNT2_HUMAN        | 27   | 1.92  | 3.77   | 0.000  | 289905     | 1093670   | 117438   | 452742    | 0.41     | 0.41    | up        |
| sp Q9UJJ9 GNPTG_HUMAN       | 13   | 1.95  | 3.86   | 0.000  | 24154      | 93255     | 10408    | 46887     | 0.43     | 0.50    | up        |
| sp P55058 PLTP_HUMAN        | 58   | 1.96  | 3.88   | 0.000  | 583422     | 2262147   | 304563   | 1414120   | 0.52     | 0.63    | up        |
| sp P12259 FA5_HUMAN         | 61   | 1.98  | 3.95   | 0.000  | 233543     | 921762    | 173399   | 479702    | 0.74     | 0.52    | up        |
| sp P01037 CYTN_HUMAN        | 121  | 1.99  | 3.97   | 0.011  | 622973     | 2474580   | 942964   | 1933569   | 1.51     | 0.78    | up        |
| sp Q9UBX1 CATF_HUMAN        | 12   | 1.99  | 3.98   | 0.000  | 22092      | 87966     | 8277     | 52738     | 0.37     | 0.60    | up        |
| sp P07711 CATL1_HUMAN       | 11   | 2.01  | 4.02   | 0.000  | 69453      | 278925    | 31628    | 136999    | 0.46     | 0.49    | up        |
| sp P12109 CO6A1_HUMAN       | 21   | 2.04  | 4.12   | 0.000  | 29092      | 119855    | 8013     | 53212     | 0.28     | 0.44    | up        |
| sp P03973 SLPI_HUMAN        | 146  | 2.05  | 4.14   | 0.000  | 966886     | 4005439   | 364541   | 3659686   | 0.38     | 0.91    | up        |
| sp Q6UXI9 NPNT_HUMAN        | 8    | 2.07  | 4.21   | 0.000  | 21366      | 89911     | 11187    | 50398     | 0.52     | 0.56    | up        |
| sp Q9NRA1 PDGFC_HUMAN       | 12   | 2.11  | 4.30   | 0.000  | 29032      | 124900    | 10826    | 83990     | 0.37     | 0.67    | up        |
| sp Q9UL18 AGO1_HUMAN        | 4    | 2.14  | 4.42   | 0.001  | 4161       | 18389     | 999      | 30229     | 0.24     | 1.64    | up        |
| sp P80303 NUCB2_HUMAN       | 64   | 2.15  | 4.42   | 0.000  | 579257     | 2562499   | 317692   | 1595970   | 0.55     | 0.62    | up        |
| sp Q9H336 CRLD1_HUMAN       | 3    | 2.15  | 4.45   | 0.009  | 1256       | 5589      | 915      | 7105      | 0.73     | 1.27    | up        |
| sp Q86UD1 OAF_HUMAN         | 11   | 2.22  | 4.65   | 0.000  | 40753      | 189659    | 21139    | 68182     | 0.52     | 0.36    | up        |
| sp P58499 FAM3B_HUMAN       | 5    | 2.22  | 4.67   | 0.000  | 9609       | 44829     | 3595     | 31413     | 0.37     | 0.70    | up        |
| sp Q9BWS9 CHID1_HUMAN       | 20   | 2.24  | 4.73   | 0.000  | 69311      | 327609    | 22571    | 185496    | 0.33     | 0.57    | up        |
| sp P98160 PGBM_HUMAN        | 418  | 2.26  | 4.80   | 0.000  | 1834748    | 8812277   | 546782   | 6494029   | 0.30     | 0.74    | up        |
| sp Q9UBS3 DNJB9_HUMAN       | 5    | 2.26  | 4.81   | 0.000  | 13362      | 64222     | 9942     | 27537     | 0.74     | 0.43    | up        |
| sp P61626 LYSC_HUMAN        | 1385 | 2.31  | 4.97   | 0.000  | 75221412   | 373685183 | 31487163 | 183899286 | 0.42     | 0.49    | up        |
| sp P31025 LCN1_HUMAN_family | 1587 | 2.32  | 5.01   | 0.000  | 50310517   | 251985844 | 34956864 | 99720435  | 0.69     | 0.40    | up        |
| sp Q9P2M7 CING_HUMAN        | 6    | 2.35  | 5.09   | 0.004  | 19878      | 101093    | 3613     | 211771    | 0.18     | 2.09    | up        |
| sp Q9BQ16 TICN3_HUMAN       | 14   | 2.39  | 5.24   | 0.000  | 29169      | 152784    | 15164    | 159289    | 0.52     | 1.04    | up        |
| sp Q92838 EDA_HUMAN         | 3    | 2.41  | 5.33   | 0.000  | 1815       | 9666      | 922      | 4965      | 0.51     | 0.51    | up        |
| sp P09958 FURIN_HUMAN       | 5    | 2.42  | 5.34   | 0.000  | 8707       | 46461     | 2633     | 32986     | 0.30     | 0.71    | up        |
| sp Q6UXB2 CXL17_HUMAN       | 10   | 2.46  | 5.50   | 0.000  | 132829     | 730425    | 72766    | 429055    | 0.55     | 0.59    | up        |
| sp Q9BXJ1 C1QT1_HUMAN       | 3    | 2.47  | 5.54   | 0.000  | 6623       | 36677     | 4132     | 25772     | 0.62     | 0.70    | up        |
| sp P21246 PTN_HUMAN         | 13   | 2.47  | 5.56   | 0.000  | 26051      | 144832    | 12325    | 157128    | 0.47     | 1.08    | up        |
| sp P22079 PERL_HUMAN        | 75   | 2.51  | 5.70   | 0.000  | 539345     | 3075435   | 218249   | 1419452   | 0.40     | 0.46    | up        |
| sp Q96DA0 ZG16B_HUMAN       | 102  | 2.59  | 6.02   | 0.000  | 1323279    | 7964362   | 495272   | 6299434   | 0.37     | 0.79    | up        |
| sp O95965 ITGBL_HUMAN       | 3    | 2.78  | 6.88   | 0.001  | 536        | 3688      | 819      | 2803      | 1.53     | 0.76    | up        |
| sp O75556 SG2A1_HUMAN       | 167  | 3.12  | 8.69   | 0.000  | 2835732    | 24639065  | 1507206  | 35061575  | 0.53     | 1.42    | up        |
| sp Q8IXB1 DJC10_HUMAN       | 3    | 6.73  | 105.87 | 0.000  | 1420       | 150387    | 2017     | 361837    | 1.42     | 2.41    | up        |

**Table A.4**

Differentially expressed proteins between pipetted long schirmer strip and short schirmer strip (reference) – see Fig. 5B

| Accession                 | PSMs | logFC | FC    | PValue | mean_short | mean_long | sd_short | sd_long | cv_short | cv_long | direction |
|---------------------------|------|-------|-------|--------|------------|-----------|----------|---------|----------|---------|-----------|
| sp Q12913 PTPRJ_HUMAN     | 3    | -2.46 | -5.50 | 0.000  | 3796       | 690       | 2378     | 374     | 0.63     | 0.54    | down      |
| sp P69905 HBA_HUMAN       | 17   | -2.05 | -4.13 | 0.001  | 1036139    | 250679    | 1204258  | 25426   | 1.16     | 0.10    | down      |
| sp Q04323 UBXN1_HUMAN     | 7    | -2.04 | -4.12 | 0.023  | 1165       | 283       | 1330     | 265     | 1.14     | 0.94    | down      |
| sp P46108 CRK_HUMAN       | 8    | -1.50 | -2.82 | 0.003  | 15864      | 5618      | 15635    | 660     | 0.99     | 0.12    | down      |
| sp P41236 IPP2_HUMAN (+1) | 3    | -1.49 | -2.81 | 0.026  | 419        | 149       | 456      | 6       | 1.09     | 0.04    | down      |
| sp Q9HBR0 S38AA_HUMAN     | 5    | -1.20 | -2.30 | 0.000  | 5845       | 2543      | 541      | 943     | 0.09     | 0.37    | down      |
| sp Q99935 PROL1_HUMAN     | 40   | -1.12 | -2.17 | 0.000  | 5294362    | 2441034   | 2177847  | 315137  | 0.41     | 0.13    | down      |
| sp P00492 HPRT_HUMAN      | 3    | -1.09 | -2.13 | 0.002  | 3402       | 1599      | 1203     | 243     | 0.35     | 0.15    | down      |
| sp Q16531 DDB1_HUMAN      | 3    | -1.06 | -2.09 | 0.000  | 11794      | 5656      | 3339     | 890     | 0.28     | 0.16    | down      |
| sp P68871 HBB_HUMAN       | 12   | -1.05 | -2.08 | 0.012  | 389363     | 187570    | 325182   | 9301    | 0.84     | 0.05    | down      |
| sp Q9GZZ8 LACRT_HUMAN     | 101  | -0.91 | -1.88 | 0.000  | 41450019   | 22012306  | 11835300 | 2664648 | 0.29     | 0.12    | down      |

(continued on next page)

**Table A.4**

(continued)

| Accession                | PSMs | logFC | FC    | PValue | mean_short | mean_long | sd_short | sd_long | cv_short | cv_long | direction |
|--------------------------|------|-------|-------|--------|------------|-----------|----------|---------|----------|---------|-----------|
| sp P53004 BIEA_HUMAN     | 4    | -0.91 | -1.88 | 0.000  | 74617      | 39654     | 20255    | 2689    | 0.27     | 0.07    | down      |
| sp O75688 PPM1B_HUMAN    | 4    | -0.91 | -1.87 | 0.016  | 14930      | 7969      | 10584    | 1221    | 0.71     | 0.15    | down      |
| sp P61758 PFD3_HUMAN     | 3    | -0.87 | -1.82 | 0.005  | 5281       | 2895      | 1431     | 932     | 0.27     | 0.32    | down      |
| sp P02795 MT2_HUMAN (+2) | 5    | -0.82 | -1.76 | 0.048  | 3436       | 1949      | 567      | 844     | 0.17     | 0.43    | down      |
| sp P02654 APOC1_HUMAN    | 6    | -0.80 | -1.75 | 0.000  | 67646      | 38746     | 19233    | 7128    | 0.28     | 0.18    | down      |
| sp Q9NVE7 PANK4_HUMAN    | 4    | -0.79 | -1.73 | 0.000  | 10496      | 6055      | 2083     | 803     | 0.20     | 0.13    | down      |
| sp A8K2U0 A2ML1_HUMAN    | 6    | -0.75 | -1.68 | 0.000  | 32593      | 19399     | 9965     | 1563    | 0.31     | 0.08    | down      |
| sp P02763 A1AG1_HUMAN    | 22   | -0.71 | -1.64 | 0.000  | 561742     | 343050    | 48871    | 29888   | 0.09     | 0.09    | down      |
| sp P81605 DCD_HUMAN      | 12   | -0.70 | -1.62 | 0.004  | 629786     | 389001    | 244675   | 38337   | 0.39     | 0.10    | down      |
| sp P58107 EPIPL_HUMAN    | 10   | -0.69 | -1.62 | 0.013  | 21631      | 13362     | 10563    | 1652    | 0.49     | 0.12    | down      |
| sp P24666 PPAC_HUMAN     | 7    | -0.69 | -1.62 | 0.000  | 13958      | 8623      | 2999     | 783     | 0.21     | 0.09    | down      |
| sp Q01082 SPTB2_HUMAN    | 5    | -0.66 | -1.58 | 0.014  | 4560       | 2891      | 763      | 593     | 0.17     | 0.21    | down      |
| sp O95747 OXSR1_HUMAN    | 3    | -0.64 | -1.56 | 0.008  | 6899       | 4420      | 1120     | 1177    | 0.16     | 0.27    | down      |
| sp O75368 SH3L1_HUMAN    | 4    | -0.64 | -1.55 | 0.001  | 21575      | 13888     | 5788     | 1462    | 0.27     | 0.11    | down      |
| sp O75351 VPS4B_HUMAN    | 3    | -0.63 | -1.54 | 0.001  | 9692       | 6278      | 1597     | 987     | 0.16     | 0.16    | down      |
| sp P31151 S10A7_HUMAN    | 10   | -0.61 | -1.53 | 0.008  | 1036679    | 678502    | 273715   | 170801  | 0.26     | 0.25    | down      |
| sp Q9P2J5 SYLC_HUMAN     | 3    | 0.59  | 1.51  | 0.018  | 2995       | 4514      | 49       | 954     | 0.02     | 0.21    | up        |
| sp P26640 SYVC_HUMAN     | 5    | 0.70  | 1.63  | 0.035  | 1692       | 2754      | 101      | 693     | 0.06     | 0.25    | up        |
| sp P05164 PERM_HUMAN     | 22   | 0.77  | 1.71  | 0.043  | 174898     | 298393    | 7704     | 192996  | 0.04     | 0.65    | up        |
| sp Q8NBJ7 SUMF2_HUMAN    | 3    | 1.53  | 2.88  | 0.010  | 5987       | 17270     | 150      | 15118   | 0.03     | 0.88    | up        |
| sp Q8WVY7 UBCP1_HUMAN    | 4    | 1.89  | 3.70  | 0.010  | 442        | 1634      | 497      | 416     | 1.12     | 0.25    | up        |
| sp Q9H4G4 GAPR1_HUMAN    | 3    | 3.86  | 14.56 | 0.000  | 152        | 2215      | 11       | 2035    | 0.07     | 0.92    | up        |

**Table A.5**

Differentially expressed proteins between Portland site and Miami site (reference) – see Fig. 6

| Accession                          | PSMs | logFC | FC    | PValue | mean_miami | mean_portland | sd_miami | sd_portland | cv_miami | cv_portland | direction |
|------------------------------------|------|-------|-------|--------|------------|---------------|----------|-------------|----------|-------------|-----------|
| tr A0A075B7B6 <br>A0A075B7B6_HUMAN | 4    | -1.93 | -3.80 | 0.048  | 10278      | 2707          | 10006    | 710         | 0.97     | 0.26        | down      |
| sp P24593 IBP5_HUMAN               | 10   | -1.50 | -2.83 | 0.008  | 63618      | 22488         | 32162    | 8407        | 0.51     | 0.37        | down      |
| sp O14815 CAN9_HUMAN               | 3    | -1.30 | -2.46 | 0.021  | 11758      | 4771          | 5807     | 447         | 0.49     | 0.09        | down      |
| sp P98088 MUC5A_HUMAN              | 224  | -1.25 | -2.38 | 0.010  | 3250990    | 1366096       | 1216103  | 789937      | 0.37     | 0.58        | down      |
| sp P35542 SAA4_HUMAN               | 6    | -1.25 | -2.38 | 0.001  | 331611     | 139483        | 107032   | 34336       | 0.32     | 0.25        | down      |
| sp P22891 PROZ_HUMAN               | 3    | -1.23 | -2.35 | 0.011  | 16946      | 7226          | 6595     | 3475        | 0.39     | 0.48        | down      |
| sp P43652 AFAM_HUMAN               | 50   | -1.23 | -2.34 | 0.003  | 848588     | 362492        | 281551   | 165197      | 0.33     | 0.46        | down      |
| sp P25815 S100P_HUMAN              | 6    | -1.23 | -2.34 | 0.000  | 15535      | 6644          | 2678     | 2448        | 0.17     | 0.37        | down      |
| sp P51159 RB27A_HUMAN              | 6    | -1.17 | -2.25 | 0.000  | 69483      | 30924         | 18337    | 1399        | 0.26     | 0.05        | down      |
| sp P02656 APOC3_HUMAN              | 6    | -1.16 | -2.23 | 0.000  | 21164      | 9481          | 3810     | 2913        | 0.18     | 0.31        | down      |
| sp O95716 RAB3D_HUMAN              | 9    | -1.15 | -2.22 | 0.006  | 78620      | 35458         | 30982    | 101         | 0.39     | 0.00        | down      |
| sp P0COL5 <br>CO4B_HUMAN_family    | 142  | -1.14 | -2.21 | 0.009  | 3081650    | 1395441       | 1162559  | 358875      | 0.38     | 0.26        | down      |
| sp P10620 MGST1_HUMAN              | 6    | -1.12 | -2.18 | 0.025  | 86057      | 39501         | 45044    | 11027       | 0.52     | 0.28        | down      |
| sp P07360 CO8G_HUMAN               | 8    | -1.07 | -2.11 | 0.001  | 86167      | 40918         | 24870    | 5178        | 0.29     | 0.13        | down      |
| sp Q96KN2 CNDP1_HUMAN              | 3    | -1.07 | -2.10 | 0.013  | 9684       | 4608          | 3395     | 1343        | 0.35     | 0.29        | down      |
| sp P08575 PTPRC_HUMAN              | 5    | -1.06 | -2.08 | 0.017  | 5945       | 2857          | 2497     | 176         | 0.42     | 0.06        | down      |
| tr A0A075B7D0 <br>A0A075B7D0_HUMAN | 5    | -1.05 | -2.07 | 0.015  | 12448      | 6028          | 3789     | 2792        | 0.30     | 0.46        | down      |
| sp P09455 RET1_HUMAN               | 14   | -1.04 | -2.05 | 0.002  | 157025     | 76580         | 46717    | 13567       | 0.30     | 0.18        | down      |
| sp Q8N118 CP4X1_HUMAN              | 3    | -1.03 | -2.04 | 0.030  | 11048      | 5418          | 4116     | 2512        | 0.37     | 0.46        | down      |
| sp P05090 APOD_HUMAN               | 26   | -1.02 | -2.03 | 0.047  | 264130     | 130339        | 117713   | 45938       | 0.45     | 0.35        | down      |
| sp Q9UBX7 KLK11_HUMAN              | 5    | -1.01 | -2.01 | 0.005  | 35616      | 17683         | 11165    | 406         | 0.31     | 0.02        | down      |
| sp P04217 A1BG_HUMAN               | 40   | -0.98 | -1.97 | 0.016  | 577457     | 293491        | 257547   | 40389       | 0.45     | 0.14        | down      |
| sp P08263 <br>GSTA1_HUMAN_family   | 48   | -0.97 | -1.96 | 0.001  | 1329269    | 678884        | 345873   | 10550       | 0.26     | 0.02        | down      |
| sp P52895 AK1C2_HUMAN              | 12   | -0.97 | -1.96 | 0.005  | 231245     | 118178        | 81177    | 8983        | 0.35     | 0.08        | down      |
| sp P04004 VTNC_HUMAN               | 19   | -0.96 | -1.94 | 0.024  | 334782     | 172216        | 162304   | 6272        | 0.48     | 0.04        | down      |
| sp Q9BZQ8 NIBA1_HUMAN              | 33   | -0.95 | -1.94 | 0.005  | 744212     | 384224        | 233502   | 40621       | 0.31     | 0.11        | down      |
| sp P02647 APOA1_HUMAN              | 79   | -0.95 | -1.93 | 0.002  | 4089805    | 2113719       | 943388   | 316398      | 0.23     | 0.15        | down      |
| sp Q14520 HABP2_HUMAN              | 10   | -0.95 | -1.93 | 0.007  | 77797      | 40346         | 25111    | 1684        | 0.32     | 0.04        | down      |
| sp Q9BV36 MELPH_HUMAN              | 5    | -0.92 | -1.90 | 0.042  | 10812      | 5701          | 4411     | 1022        | 0.41     | 0.18        | down      |
| sp Q9H8H3 MET17A_HUMAN             | 6    | -0.91 | -1.88 | 0.044  | 132601     | 70454         | 60071    | 7543        | 0.45     | 0.11        | down      |
| sp P02790 HEMO_HUMAN               | 117  | -0.91 | -1.87 | 0.018  | 2751647    | 1468429       | 1083529  | 5900        | 0.39     | 0.00        | down      |
| sp P02649 APOE_HUMAN               | 18   | -0.90 | -1.86 | 0.020  | 171215     | 91886         | 36200    | 49606       | 0.21     | 0.54        | down      |
| sp P19823 TIH2_HUMAN               | 49   | -0.88 | -1.85 | 0.018  | 1219218    | 660399        | 483474   | 58480       | 0.40     | 0.09        | down      |
| sp Q8IXJ6 SIR2_HUMAN               | 3    | -0.86 | -1.82 | 0.004  | 18497      | 10160         | 2109     | 3509        | 0.11     | 0.35        | down      |
| sp O15195 VILL_HUMAN               | 8    | -0.86 | -1.81 | 0.007  | 52925      | 29164         | 12817    | 7161        | 0.24     | 0.25        | down      |
| sp Q9BS40 LXN_HUMAN                | 18   | -0.84 | -1.80 | 0.022  | 324644     | 180794        | 125092   | 3707        | 0.39     | 0.02        | down      |
| sp Q8IXB1 DJC10_HUMAN              | 4    | -0.84 | -1.79 | 0.032  | 7288       | 4072          | 2218     | 1308        | 0.30     | 0.32        | down      |
| sp P02765 FETUA_HUMAN              | 69   | -0.84 | -1.79 | 0.034  | 4482193    | 2504859       | 1819423  | 340960      | 0.41     | 0.14        | down      |
| sp Q9Y696 CLIC4_HUMAN              | 11   | -0.84 | -1.78 | 0.024  | 66140      | 37075         | 22049    | 7035        | 0.33     | 0.19        | down      |
| sp P00742 FA10_HUMAN               | 8    | -0.82 | -1.76 | 0.018  | 26211      | 14883         | 7848     | 1171        | 0.30     | 0.08        | down      |
| sp P22792 CPN2_HUMAN               | 10   | -0.81 | -1.76 | 0.022  | 66330      | 37703         | 22303    | 906         | 0.34     | 0.02        | down      |

(continued on next page)



Table A.5

(continued)

| Accession                 | PSMs | logFC | FC    | PValue | mean_miami | mean_portland | sd_miami | sd_portland | cv_miami | cv_portland | direction |
|---------------------------|------|-------|-------|--------|------------|---------------|----------|-------------|----------|-------------|-----------|
| sp O43175 SERA_HUMAN      | 26   | -0.81 | -1.75 | 0.037  | 410474     | 234145        | 143823   | 73340       | 0.35     | 0.31        | down      |
| sp P00748 FA12_HUMAN      | 14   | -0.80 | -1.75 | 0.035  | 53633      | 30718         | 8167     | 17042       | 0.15     | 0.55        | down      |
| sp P28161 GSTM2_HUMAN     | 3    | -0.80 | -1.75 | 0.020  | 46424      | 26591         | 11829    | 8098        | 0.25     | 0.30        | down      |
| sp P01011 AACT_HUMAN      | 75   | -0.80 | -1.74 | 0.006  | 1339489    | 767783        | 340930   | 22766       | 0.25     | 0.03        | down      |
| sp P19827 ITIH1_HUMAN     | 34   | -0.80 | -1.74 | 0.020  | 535497     | 307781        | 184236   | 57527       | 0.34     | 0.19        | down      |
| sp O95994 AGR2_HUMAN      | 39   | -0.79 | -1.73 | 0.003  | 1102436    | 635636        | 204993   | 111040      | 0.19     | 0.17        | down      |
| sp P08962 CD63_HUMAN      | 4    | -0.79 | -1.73 | 0.009  | 82483      | 47632         | 16147    | 13434       | 0.20     | 0.28        | down      |
| sp P01042 KNG1_HUMAN      | 52   | -0.79 | -1.73 | 0.035  | 885227     | 511623        | 331263   | 21548       | 0.37     | 0.04        | down      |
| sp P02760 AMBIP_HUMAN     | 24   | -0.79 | -1.73 | 0.014  | 196427     | 113537        | 58524    | 13394       | 0.30     | 0.12        | down      |
| sp O43866 CD5L_HUMAN      | 14   | -0.78 | -1.72 | 0.008  | 147992     | 86174         | 28269    | 22653       | 0.19     | 0.26        | down      |
| sp O95445 APOM_HUMAN      | 7    | -0.77 | -1.70 | 0.035  | 79036      | 46451         | 27286    | 1307        | 0.35     | 0.03        | down      |
| sp P05156 CFAL_HUMAN      | 24   | -0.76 | -1.70 | 0.004  | 280415     | 165282        | 58538    | 26828       | 0.21     | 0.16        | down      |
| sp O95881 TXD12_HUMAN     | 3    | -0.76 | -1.69 | 0.030  | 38028      | 22469         | 8747     | 7584        | 0.23     | 0.34        | down      |
| sp P49914 MTHFS_HUMAN     | 3    | -0.75 | -1.69 | 0.021  | 6572       | 3897          | 1450     | 262         | 0.22     | 0.07        | down      |
| sp P07357 CO8A_HUMAN      | 19   | -0.75 | -1.69 | 0.044  | 187679     | 111365        | 68676    | 10566       | 0.37     | 0.09        | down      |
| sp Q96AX2 RAB37_HUMAN     | 4    | -0.75 | -1.68 | 0.033  | 23570      | 14029         | 6086     | 3370        | 0.26     | 0.24        | down      |
| sp P03952 KLKB1_HUMAN     | 22   | -0.74 | -1.67 | 0.007  | 212667     | 127151        | 51155    | 4984        | 0.24     | 0.04        | down      |
| sp Q9NPH2 INO1_HUMAN      | 6    | -0.74 | -1.67 | 0.013  | 30094      | 18029         | 6547     | 2129        | 0.22     | 0.12        | down      |
| sp P23142 FBLN1_HUMAN     | 12   | -0.74 | -1.67 | 0.046  | 55763      | 33466         | 21246    | 3030        | 0.38     | 0.09        | down      |
| sp P02766 TTHY_HUMAN      | 76   | -0.73 | -1.66 | 0.031  | 1077992    | 649598        | 335454   | 12227       | 0.31     | 0.02        | down      |
| sp P18428 LBP_HUMAN       | 5    | -0.73 | -1.66 | 0.035  | 45692      | 27536         | 13983    | 5572        | 0.31     | 0.20        | down      |
| sp Q93084 AT2A3_HUMAN     | 8    | -0.71 | -1.64 | 0.015  | 19430      | 11874         | 4528     | 95          | 0.23     | 0.01        | down      |
| sp P17252 KPCA_HUMAN      | 8    | -0.71 | -1.63 | 0.021  | 25345      | 15531         | 6537     | 1819        | 0.26     | 0.12        | down      |
| sp Q5T5C0 STXB5_HUMAN     | 10   | -0.69 | -1.61 | 0.008  | 20014      | 12417         | 2887     | 1863        | 0.14     | 0.15        | down      |
| sp P30626 SORCN_HUMAN     | 6    | -0.68 | -1.60 | 0.009  | 61100      | 38069         | 11175    | 910         | 0.18     | 0.02        | down      |
| sp P01031 CO5_HUMAN       | 53   | -0.68 | -1.60 | 0.019  | 453061     | 282317        | 121190   | 6045        | 0.27     | 0.02        | down      |
| sp P47736 RPGP1_HUMAN     | 3    | -0.68 | -1.60 | 0.005  | 10747      | 6703          | 795      | 14          | 0.07     | 0.00        | down      |
| sp P08603 CFAH_HUMAN      | 91   | -0.68 | -1.60 | 0.033  | 1467607    | 918694        | 429809   | 116192      | 0.29     | 0.13        | down      |
| sp P05155 IC1_HUMAN       | 24   | -0.67 | -1.59 | 0.028  | 1068658    | 673773        | 274814   | 69916       | 0.26     | 0.10        | down      |
| sp Q8NBS9 TXND5_HUMAN     | 13   | -0.66 | -1.58 | 0.015  | 147491     | 93499         | 33885    | 87          | 0.23     | 0.00        | down      |
| sp Q6BCY4 NB5R2_HUMAN     | 9    | -0.63 | -1.55 | 0.007  | 38452      | 24837         | 4049     | 404         | 0.11     | 0.02        | down      |
| sp P55145 MANF_HUMAN      | 3    | -0.62 | -1.54 | 0.028  | 15765      | 10228         | 2025     | 2974        | 0.13     | 0.29        | down      |
| sp P00751 CFAB_HUMAN      | 72   | -0.62 | -1.54 | 0.048  | 1937722    | 1260085       | 471585   | 303696      | 0.24     | 0.24        | down      |
| sp O00194 RB27B_HUMAN     | 13   | -0.62 | -1.54 | 0.050  | 215493     | 140250        | 58059    | 9748        | 0.27     | 0.07        | down      |
| sp P35080 PROF2_HUMAN     | 6    | -0.62 | -1.54 | 0.025  | 21959      | 14300         | 3431     | 3251        | 0.16     | 0.23        | down      |
| sp O00391 QSOX1_HUMAN     | 39   | -0.62 | -1.53 | 0.031  | 337729     | 220029        | 70140    | 61506       | 0.21     | 0.28        | down      |
| sp P00734 THRB_HUMAN      | 59   | -0.61 | -1.53 | 0.028  | 577613     | 378114        | 146839   | 11882       | 0.25     | 0.03        | down      |
| sp Q9H299 SH3L3_HUMAN     | 11   | -0.59 | -1.51 | 0.038  | 37693      | 25011         | 7457     | 3367        | 0.20     | 0.13        | down      |
| sp O60268 K0513_HUMAN     | 3    | -0.59 | -1.50 | 0.037  | 16375      | 10885         | 2696     | 2440        | 0.16     | 0.22        | down      |
| sp P35637 FUS_HUMAN       | 4    | 0.59  | 1.51  | 0.036  | 33958      | 51144         | 6151     | 15203       | 0.18     | 0.30        | up        |
| sp P36578 RL4_HUMAN       | 11   | 0.62  | 1.54  | 0.010  | 94726      | 146088        | 17840    | 2860        | 0.19     | 0.02        | up        |
| sp Q15233 NONO_HUMAN      | 7    | 0.63  | 1.55  | 0.047  | 70176      | 108514        | 19310    | 16913       | 0.28     | 0.16        | up        |
| sp Q14195 DPYL3_HUMAN     | 9    | 0.63  | 1.55  | 0.049  | 42546      | 65885         | 12947    | 5470        | 0.30     | 0.08        | up        |
| sp P07711 CATL1_HUMAN     | 14   | 0.66  | 1.58  | 0.034  | 53519      | 84583         | 14275    | 19170       | 0.27     | 0.23        | up        |
| sp O43405 COCH_HUMAN      | 13   | 0.67  | 1.59  | 0.030  | 35982      | 57357         | 4351     | 26846       | 0.12     | 0.47        | up        |
| sp Q641Q2 WAC2A_HUMAN     | 6    | 0.68  | 1.60  | 0.042  | 3772       | 6023          | 943      | 561         | 0.25     | 0.09        | up        |
| sp P05387 RLA2_HUMAN      | 8    | 0.70  | 1.63  | 0.000  | 88705      | 144334        | 6877     | 4507        | 0.08     | 0.03        | up        |
| sp O60437 PEPL_HUMAN      | 100  | 0.71  | 1.64  | 0.001  | 1013398    | 1658749       | 149703   | 54161       | 0.15     | 0.03        | up        |
| sp A0A0C4DH67 KV108_HUMAN | 7    | 0.72  | 1.65  | 0.016  | 2659       | 4374          | 217      | 585         | 0.08     | 0.13        | up        |
| sp P16989 YBOX3_HUMAN     | 5    | 0.72  | 1.65  | 0.012  | 7618       | 12551         | 1800     | 1320        | 0.24     | 0.11        | up        |
| sp O15344 TRI18_HUMAN     | 3    | 0.74  | 1.67  | 0.043  | 13332      | 22200         | 391      | 13982       | 0.03     | 0.63        | up        |
| sp Q8IW75 SPA12_HUMAN     | 5    | 0.74  | 1.67  | 0.048  | 20994      | 34962         | 7975     | 9107        | 0.38     | 0.26        | up        |
| sp Q6VY07 PACS1_HUMAN     | 12   | 0.74  | 1.67  | 0.044  | 84195      | 140898        | 11077    | 88592       | 0.13     | 0.63        | up        |
| sp Q09666 AHNK_HUMAN      | 144  | 0.77  | 1.71  | 0.002  | 1958183    | 3341649       | 275061   | 974845      | 0.14     | 0.29        | up        |
| sp P21397 AOFA_HUMAN      | 11   | 0.78  | 1.71  | 0.001  | 106288     | 182042        | 15292    | 23415       | 0.14     | 0.13        | up        |
| sp Q07002 CDK18_HUMAN     | 3    | 0.80  | 1.74  | 0.044  | 2199       | 3818          | 603      | 1332        | 0.27     | 0.35        | up        |
| sp Q9Y2W1 TR150_HUMAN     | 5    | 0.80  | 1.75  | 0.013  | 6395       | 11162         | 1679     | 684         | 0.26     | 0.06        | up        |
| sp Q9UBT3 DKK4_HUMAN      | 10   | 0.81  | 1.75  | 0.020  | 28217      | 49428         | 7162     | 22797       | 0.25     | 0.46        | up        |
| sp O94903 PLPHP_HUMAN     | 5    | 0.83  | 1.78  | 0.031  | 15850      | 28153         | 2281     | 18082       | 0.14     | 0.64        | up        |
| sp Q5D862 FILA2_HUMAN     | 24   | 0.86  | 1.81  | 0.040  | 260672     | 471928        | 137313   | 75107       | 0.53     | 0.16        | up        |
| sp Q8WVV4 POF1B_HUMAN     | 7    | 0.87  | 1.83  | 0.031  | 24754      | 45365         | 6557     | 27167       | 0.26     | 0.60        | up        |
| sp Q8N1A6 CD033_HUMAN     | 3    | 0.88  | 1.84  | 0.015  | 38600      | 71001         | 11338    | 28054       | 0.29     | 0.40        | up        |
| sp P47929 LEG7_HUMAN      | 10   | 0.88  | 1.84  | 0.010  | 84273      | 155371        | 15951    | 81177       | 0.19     | 0.52        | up        |
| sp A0A0A0MT36 KVD21_HUMAN | 3    | 0.91  | 1.88  | 0.045  | 2237       | 4204          | 971      | 548         | 0.43     | 0.13        | up        |
| sp Q96QA5 GSDMA_HUMAN     | 7    | 0.94  | 1.91  | 0.015  | 101879     | 194918        | 47337    | 17437       | 0.46     | 0.09        | up        |
| sp P28907 CD38_HUMAN      | 5    | 0.95  | 1.93  | 0.000  | 29183      | 56202         | 3892     | 14171       | 0.13     | 0.25        | up        |
| sp O75635 SPB7_HUMAN      | 4    | 0.95  | 1.94  | 0.003  | 11116      | 21526         | 1613     | 9655        | 0.15     | 0.45        | up        |
| sp Q9UBG3 CRNN_HUMAN      | 11   | 0.98  | 1.97  | 0.029  | 103001     | 203318        | 31060    | 134861      | 0.30     | 0.66        | up        |
| sp Q96EN8 MOCOS_HUMAN     | 7    | 0.99  | 1.99  | 0.009  | 18121      | 36005         | 7033     | 6555        | 0.39     | 0.18        | up        |
| sp P14317 HCLS1_HUMAN     | 5    | 1.00  | 1.99  | 0.002  | 4138       | 8254          | 1154     | 469         | 0.28     | 0.06        | up        |
| sp P14923 PLAK_HUMAN      | 35   | 1.00  | 2.00  | 0.022  | 386468     | 771928        | 94730    | 558498      | 0.25     | 0.72        | up        |
| sp O75556 SG2A1_HUMAN     | 107  | 1.02  | 2.02  | 0.028  | 926984     | 1873386       | 430354   | 1014889     | 0.46     | 0.54        | up        |
| sp Q14050 CO9A3_HUMAN     | 7    | 1.07  | 2.10  | 0.003  | 18471      | 38858         | 6178     | 509         | 0.33     | 0.01        | up        |
| sp P48960 AGRE5_HUMAN     | 3    | 1.07  | 2.10  | 0.024  | 1980       | 4165          | 814      | 1421        | 0.41     | 0.34        | up        |

(continued on next page)

**Table A.5** (continued)

| Accession                  | PSMs | logFC | FC   | PValue | mean_miami | mean_portland | sd_miami | sd_portland | cv_miami | cv_portland | direction |
|----------------------------|------|-------|------|--------|------------|---------------|----------|-------------|----------|-------------|-----------|
| sp P0DTE7 AMY1B_HUMAN (+2) | 43   | 1.09  | 2.13 | 0.000  | 317317     | 675085        | 60323    | 65500       | 0.19     | 0.10        | up        |
| sp P30511 HLAF_HUMAN       | 3    | 1.10  | 2.15 | 0.039  | 1621       | 3480          | 859      | 349         | 0.53     | 0.10        | up        |
| sp Q96P63 SPB12_HUMAN      | 14   | 1.10  | 2.15 | 0.045  | 63752      | 137080        | 34573    | 94486       | 0.54     | 0.69        | up        |
| sp Q13835 PKP1_HUMAN       | 12   | 1.11  | 2.17 | 0.031  | 53528      | 115935        | 2157     | 108615      | 0.04     | 0.94        | up        |
| sp P15924 DESP_HUMAN       | 144  | 1.12  | 2.18 | 0.015  | 884715     | 1924808       | 177379   | 1525616     | 0.20     | 0.79        | up        |
| sp Q08188 TGM3_HUMAN       | 20   | 1.19  | 2.27 | 0.003  | 81115      | 184488        | 28917    | 86506       | 0.36     | 0.47        | up        |
| sp P40394 ADH7_HUMAN       | 47   | 1.19  | 2.28 | 0.004  | 1193876    | 2720674       | 510930   | 484020      | 0.43     | 0.18        | up        |
| sp P13498 CY24A_HUMAN      | 3    | 1.19  | 2.28 | 0.012  | 20046      | 45743         | 8946     | 24224       | 0.45     | 0.53        | up        |
| sp Q02413 DSG1_HUMAN       | 32   | 1.32  | 2.50 | 0.010  | 118285     | 295824        | 34437    | 243907      | 0.29     | 0.82        | up        |
| sp Q86T26 TM11B_HUMAN      | 4    | 1.34  | 2.53 | 0.017  | 8630       | 21855         | 2980     | 19747       | 0.35     | 0.90        | up        |
| sp Q6UWP8 SBSN_HUMAN       | 4    | 1.40  | 2.64 | 0.005  | 21289      | 56101         | 5186     | 46621       | 0.24     | 0.83        | up        |
| sp P30838 AL3A1_HUMAN      | 104  | 1.40  | 2.64 | 0.000  | 2137012    | 5641749       | 885373   | 518327      | 0.41     | 0.09        | up        |
| sp A0A0C4DH33 HV124_HUMAN  | 3    | 1.46  | 2.75 | 0.009  | 2784       | 7643          | 36       | 7343        | 0.01     | 0.96        | up        |
| sp Q08554 DSC1_HUMAN       | 15   | 1.60  | 3.03 | 0.005  | 46485      | 140884        | 10555    | 137276      | 0.23     | 0.97        | up        |
| sp O4351 S26A4_HUMAN       | 3    | 1.64  | 3.12 | 0.031  | 4027       | 12552         | 2547     | 13423       | 0.63     | 1.07        | up        |
| sp O95968 SG1D1_HUMAN      | 63   | 1.69  | 3.23 | 0.000  | 3063467    | 9905511       | 889072   | 6416356     | 0.29     | 0.65        | up        |

**Table A.6**

Differentially expressed proteins between contact lens user and non-user (reference) with a wide range of Schirmer strip wetted length – see Fig. 7A

| Accession                      | PSMs | logFC | FC    | PValue | mean_no  | mean_yes | sd_no   | sd_yes  | cv_no | cv_yes | direction |
|--------------------------------|------|-------|-------|--------|----------|----------|---------|---------|-------|--------|-----------|
| sp P02795 MT2_HUMAN (+2)       | 6    | -1.78 | -3.43 | 0.001  | 1288     | 375      | 365     | 372     | 0.28  | 0.99   | down      |
| sp P02652 APOA2_HUMAN          | 5    | -1.75 | -3.35 | 0.001  | 83799    | 24985    | 125022  | 5036    | 1.49  | 0.20   | down      |
| sp Q8N6T3 ARFG1_HUMAN          | 3    | -1.55 | -2.92 | 0.001  | 954      | 326      | 156     | 288     | 0.16  | 0.88   | down      |
| sp O95965 ITGBL_HUMAN          | 6    | -1.38 | -2.61 | 0.020  | 58543    | 22431    | 96114   | 9833    | 1.64  | 0.44   | down      |
| sp P23141 EST1_HUMAN           | 11   | -1.11 | -2.15 | 0.006  | 91057    | 42325    | 50566   | 19170   | 0.56  | 0.45   | down      |
| sp Q9P2B2 FPRP_HUMAN           | 3    | -1.00 | -2.00 | 0.018  | 3318     | 1661     | 858     | 725     | 0.26  | 0.44   | down      |
| sp Q9NVA2 SEP11_HUMAN          | 3    | -0.90 | -1.87 | 0.008  | 3474     | 1862     | 268     | 705     | 0.08  | 0.38   | down      |
| sp Q05639 EF1A2_HUMAN          | 5    | -0.89 | -1.85 | 0.011  | 34702    | 18750    | 30254   | 5052    | 0.87  | 0.27   | down      |
| sp Q8TC07 TBC15_HUMAN          | 5    | -0.86 | -1.81 | 0.014  | 8115     | 4477     | 6819    | 1206    | 0.84  | 0.27   | down      |
| sp P02656 APOC3_HUMAN          | 4    | -0.84 | -1.79 | 0.049  | 14940    | 8342     | 16067   | 2837    | 1.08  | 0.34   | down      |
| sp O14936 CSKP_HUMAN           | 3    | -0.73 | -1.66 | 0.050  | 5046     | 3033     | 1926    | 1543    | 0.38  | 0.51   | down      |
| sp Q9BRF8 CPPED_HUMAN          | 16   | -0.73 | -1.66 | 0.033  | 204415   | 123386   | 94119   | 73696   | 0.46  | 0.60   | down      |
| sp Q14978 NOLC1_HUMAN          | 4    | -0.71 | -1.64 | 0.044  | 6937     | 4230     | 1800    | 2263    | 0.26  | 0.53   | down      |
| sp P49207 RL34_HUMAN           | 6    | -0.67 | -1.60 | 0.002  | 52764    | 33069    | 20200   | 6167    | 0.38  | 0.19   | down      |
| sp P51858 HDGF_HUMAN           | 11   | -0.64 | -1.56 | 0.001  | 54720    | 35163    | 12236   | 7497    | 0.22  | 0.21   | down      |
| sp P13073 COX41_HUMAN          | 7    | -0.62 | -1.53 | 0.003  | 140927   | 91918    | 34237   | 20023   | 0.24  | 0.22   | down      |
| sp Q9NXG2 THUM1_HUMAN          | 3    | -0.60 | -1.52 | 0.011  | 9438     | 6216     | 3064    | 1713    | 0.32  | 0.28   | down      |
| sp Q95523 SORT1_HUMAN          | 3    | 0.59  | 1.50  | 0.028  | 7571     | 11364    | 1936    | 3809    | 0.26  | 0.34   | up        |
| sp Q969Q5 RAB24_HUMAN          | 3    | 0.59  | 1.50  | 0.022  | 5503     | 8267     | 889     | 3241    | 0.16  | 0.39   | up        |
| sp Q9BTY2 FUCO2_HUMAN          | 9    | 0.59  | 1.50  | 0.046  | 36799    | 55363    | 11273   | 22582   | 0.31  | 0.41   | up        |
| tr A0A075B7B8 A0A075B7B8_HUMAN | 5    | 0.61  | 1.52  | 0.044  | 33788    | 51402    | 18365   | 14797   | 0.54  | 0.29   | up        |
| sp P00450 CERU_HUMAN           | 220  | 0.61  | 1.53  | 0.028  | 1504664  | 2298893  | 477572  | 778312  | 0.32  | 0.34   | up        |
| sp O75976 CBPD_HUMAN           | 13   | 0.62  | 1.53  | 0.028  | 23329    | 35748    | 5119    | 13155   | 0.22  | 0.37   | up        |
| sp Q9H9Q2 CSN7B_HUMAN          | 3    | 0.62  | 1.54  | 0.035  | 1385     | 2130     | 267     | 660     | 0.19  | 0.31   | up        |
| sp P01011 AACT_HUMAN           | 70   | 0.62  | 1.54  | 0.009  | 659007   | 1014941  | 152764  | 295550  | 0.23  | 0.29   | up        |
| sp P02775 CXCL7_HUMAN          | 3    | 0.62  | 1.54  | 0.014  | 27609    | 42531    | 9822    | 13741   | 0.36  | 0.32   | up        |
| sp P49257 LMAN1_HUMAN          | 15   | 0.62  | 1.54  | 0.003  | 59489    | 91666    | 10451   | 24205   | 0.18  | 0.26   | up        |
| sp P26572 MGAT1_HUMAN          | 8    | 0.62  | 1.54  | 0.041  | 30031    | 46299    | 8004    | 22559   | 0.27  | 0.49   | up        |
| sp O15173 PGRC2_HUMAN          | 3    | 0.63  | 1.54  | 0.015  | 2757     | 4258     | 396     | 1387    | 0.14  | 0.33   | up        |
| sp P00740 FA9_HUMAN            | 4    | 0.64  | 1.55  | 0.002  | 6587     | 10231    | 1426    | 2570    | 0.22  | 0.25   | up        |
| sp Q96BQ1 FAM3D_HUMAN          | 11   | 0.64  | 1.56  | 0.010  | 30536    | 47730    | 5758    | 17073   | 0.19  | 0.36   | up        |
| sp P50897 PPT1_HUMAN           | 3    | 0.64  | 1.56  | 0.013  | 8199     | 12821    | 2277    | 4101    | 0.28  | 0.32   | up        |
| sp B9A064 IGLL5_HUMAN          | 44   | 0.65  | 1.57  | 0.010  | 161314   | 252748   | 45826   | 82156   | 0.28  | 0.33   | up        |
| sp Q9NZ08 ERAP1_HUMAN          | 28   | 0.66  | 1.58  | 0.013  | 147924   | 233655   | 35359   | 86000   | 0.24  | 0.37   | up        |
| sp Q9H0P0 5NT3A_HUMAN          | 6    | 0.66  | 1.58  | 0.003  | 26509    | 41909    | 4665    | 12639   | 0.18  | 0.30   | up        |
| sp Q02809 PLOD1_HUMAN          | 35   | 0.66  | 1.58  | 0.041  | 144287   | 228129   | 36802   | 113096  | 0.26  | 0.50   | up        |
| tr A0A075B7F0 A0A075B7F0_HUMAN | 3    | 0.66  | 1.58  | 0.028  | 17651    | 27926    | 8911    | 8254    | 0.50  | 0.30   | up        |
| sp P20062 TCO2_HUMAN           | 11   | 0.66  | 1.58  | 0.007  | 18606    | 29479    | 3697    | 9767    | 0.20  | 0.33   | up        |
| sp Q8IZ07 AN13A_HUMAN          | 4    | 0.67  | 1.59  | 0.005  | 5831     | 9249     | 932     | 2920    | 0.16  | 0.32   | up        |
| sp Q13449 LSAMP_HUMAN          | 4    | 0.67  | 1.59  | 0.011  | 9501     | 15135    | 3114    | 4646    | 0.33  | 0.31   | up        |
| sp P04433 KV311_HUMAN          | 23   | 0.67  | 1.59  | 0.046  | 105558   | 168228   | 61888   | 50241   | 0.59  | 0.30   | up        |
| sp Q02818 NUCB1_HUMAN          | 22   | 0.68  | 1.60  | 0.044  | 151636   | 242649   | 47517   | 121053  | 0.31  | 0.50   | up        |
| sp Q9H173 SIL1_HUMAN           | 9    | 0.68  | 1.60  | 0.026  | 43065    | 69046    | 12651   | 31044   | 0.29  | 0.45   | up        |
| sp P01876 IGHA1_HUMAN          | 606  | 0.69  | 1.61  | 0.035  | 10300857 | 16565075 | 5623403 | 4603321 | 0.55  | 0.28   | up        |
| sp Q01459 DIAC_HUMAN           | 10   | 0.69  | 1.61  | 0.023  | 78864    | 127118   | 19026   | 59685   | 0.24  | 0.47   | up        |
| sp O75787 RENK_HUMAN           | 6    | 0.69  | 1.61  | 0.033  | 18670    | 30137    | 5402    | 14989   | 0.29  | 0.50   | up        |
| sp P01763 HV348_HUMAN_family   | 11   | 0.69  | 1.62  | 0.032  | 24811    | 40120    | 6099    | 18539   | 0.25  | 0.46   | up        |
| sp P10909 CLUS_HUMAN           | 113  | 0.70  | 1.62  | 0.008  | 954695   | 1547218  | 160571  | 539271  | 0.17  | 0.35   | up        |
| sp P01762 HV311_HUMAN          | 8    | 0.70  | 1.62  | 0.047  | 13124    | 21316    | 6679    | 8775    | 0.51  | 0.41   | up        |

(continued on next page)

Table A.6

(continued)

| Accession                        | PSMs | logFC | FC   | PValue_ | mean_no  | mean_yes | sd_no   | sd_yes  | cv_no | cv_yes | direction |
|----------------------------------|------|-------|------|---------|----------|----------|---------|---------|-------|--------|-----------|
| sp O75635 SPB7_HUMAN             | 6    | 0.70  | 1.62 | 0.048   | 24122    | 39189    | 6742    | 23342   | 0.28  | 0.60   | up        |
| sp Q12965 MYO1E_HUMAN            | 6    | 0.70  | 1.63 | 0.006   | 3997     | 6500     | 866     | 2217    | 0.22  | 0.34   | up        |
| sp O00560 SDCB1_HUMAN            | 15   | 0.70  | 1.63 | 0.003   | 19230    | 31293    | 3146    | 9428    | 0.16  | 0.30   | up        |
| sp P20061 TCO1_HUMAN             | 105  | 0.70  | 1.63 | 0.049   | 806307   | 1314187  | 330870  | 628191  | 0.41  | 0.48   | up        |
| sp Q16610 ECM1_HUMAN             | 5    | 0.71  | 1.63 | 0.026   | 15465    | 25233    | 3174    | 12190   | 0.21  | 0.48   | up        |
| sp P07711 CATL1_HUMAN            | 13   | 0.71  | 1.64 | 0.039   | 80386    | 131436   | 33434   | 65415   | 0.42  | 0.50   | up        |
| sp P10586 PTPRF_HUMAN            | 16   | 0.73  | 1.65 | 0.008   | 13483    | 22299    | 3359    | 8792    | 0.25  | 0.39   | up        |
| sp P01780 HV307_HUMAN            | 10   | 0.73  | 1.66 | 0.047   | 223618   | 371397   | 111108  | 179153  | 0.50  | 0.48   | up        |
| sp P48723 HSP13_HUMAN            | 8    | 0.74  | 1.67 | 0.007   | 30738    | 51201    | 10329   | 17793   | 0.34  | 0.35   | up        |
| sp O14657 TOR1B_HUMAN            | 3    | 0.74  | 1.67 | 0.020   | 4280     | 7131     | 982     | 3341    | 0.23  | 0.47   | up        |
| sp O60568 PLOD3_HUMAN            | 5    | 0.74  | 1.67 | 0.010   | 7280     | 12136    | 2125    | 4948    | 0.29  | 0.41   | up        |
| sp P35475 IDUA_HUMAN             | 7    | 0.74  | 1.67 | 0.026   | 13255    | 22181    | 3305    | 11943   | 0.25  | 0.54   | up        |
| sp Q96PP9 GBP4_HUMAN             | 7    | 0.75  | 1.68 | 0.046   | 17003    | 28528    | 1329    | 17951   | 0.08  | 0.63   | up        |
| sp Q9Y646 CBPQ_HUMAN             | 5    | 0.75  | 1.69 | 0.035   | 10450    | 17616    | 2649    | 10307   | 0.25  | 0.59   | up        |
| sp Q6VY07 PACS1_HUMAN            | 6    | 0.76  | 1.69 | 0.011   | 58439    | 98960    | 7847    | 47070   | 0.13  | 0.48   | up        |
| sp Q9UNW1 MINP1_HUMAN            | 10   | 0.77  | 1.70 | 0.005   | 45083    | 76697    | 10370   | 31529   | 0.23  | 0.41   | up        |
| sp Q14118 DAG1_HUMAN             | 5    | 0.77  | 1.70 | 0.011   | 40222    | 68574    | 8770    | 32173   | 0.22  | 0.47   | up        |
| sp P06280 AGAL_HUMAN             | 6    | 0.77  | 1.71 | 0.020   | 10074    | 17220    | 2606    | 9258    | 0.26  | 0.54   | up        |
| sp Q9UIV8 SPB13_HUMAN            | 3    | 0.78  | 1.72 | 0.023   | 2473     | 4261     | 245     | 2612    | 0.10  | 0.61   | up        |
| sp P05161 ISG15_HUMAN            | 5    | 0.79  | 1.73 | 0.003   | 3857     | 6670     | 1130    | 2196    | 0.29  | 0.33   | up        |
| sp A0A0B4J1U7 HV601_HUMAN        | 19   | 0.79  | 1.73 | 0.040   | 117956   | 204038   | 56746   | 94681   | 0.48  | 0.46   | up        |
| sp P45877 PPIC_HUMAN             | 4    | 0.79  | 1.73 | 0.006   | 16771    | 29017    | 2045    | 12311   | 0.12  | 0.42   | up        |
| sp P13284 GILT_HUMAN             | 5    | 0.79  | 1.73 | 0.009   | 11776    | 20408    | 2921    | 9484    | 0.25  | 0.46   | up        |
| sp A0A0B4J1V2 HV226_HUMAN        | 13   | 0.80  | 1.74 | 0.023   | 94387    | 163919   | 53269   | 63496   | 0.56  | 0.39   | up        |
| sp P03950 ANGI_HUMAN             | 16   | 0.80  | 1.74 | 0.023   | 151077   | 263135   | 50139   | 143841  | 0.33  | 0.55   | up        |
| sp P34096 RNAS4_HUMAN            | 16   | 0.81  | 1.75 | 0.024   | 346072   | 605216   | 89404   | 339328  | 0.26  | 0.56   | up        |
| sp P19021 AMD_HUMAN              | 20   | 0.81  | 1.75 | 0.013   | 90872    | 158943   | 22544   | 78485   | 0.25  | 0.49   | up        |
| sp P17900 SAP3_HUMAN             | 6    | 0.81  | 1.75 | 0.044   | 57834    | 101429   | 10177   | 74379   | 0.18  | 0.73   | up        |
| sp A8K2U0 A2ML1_HUMAN            | 13   | 0.82  | 1.76 | 0.019   | 14791    | 26099    | 2538    | 15315   | 0.17  | 0.59   | up        |
| sp P01833 PIGR_HUMAN             | 814  | 0.83  | 1.78 | 0.020   | 11759538 | 20925349 | 7092116 | 7049969 | 0.60  | 0.34   | up        |
| sp Q9UJ9 GNPTG_HUMAN             | 6    | 0.84  | 1.79 | 0.015   | 7346     | 13123    | 2490    | 6508    | 0.34  | 0.50   | up        |
| sp Q13162 PRDX4_HUMAN            | 8    | 0.85  | 1.80 | 0.021   | 35762    | 64324    | 11479   | 36672   | 0.32  | 0.57   | up        |
| sp O00584 RNT2_HUMAN             | 26   | 0.85  | 1.80 | 0.022   | 229206   | 412652   | 47758   | 250814  | 0.21  | 0.61   | up        |
| sp Q96AX2 RAB37_HUMAN            | 6    | 0.85  | 1.80 | 0.022   | 33782    | 60971    | 6911    | 40429   | 0.20  | 0.66   | up        |
| sp A0A0C4DH38 HV551_HUMAN_family | 36   | 0.85  | 1.81 | 0.035   | 333289   | 602363   | 173496  | 280999  | 0.52  | 0.47   | up        |
| sp Q11201 SLA4A_HUMAN            | 11   | 0.86  | 1.81 | 0.013   | 54321    | 98297    | 13340   | 55290   | 0.25  | 0.56   | up        |
| sp P09972 ALDOC_HUMAN            | 11   | 0.86  | 1.82 | 0.007   | 85994    | 156228   | 15283   | 89742   | 0.18  | 0.57   | up        |
| sp P01714 LV319_HUMAN            | 18   | 0.86  | 1.82 | 0.015   | 109185   | 198394   | 54387   | 70075   | 0.50  | 0.35   | up        |
| sp P36980 FHR2_HUMAN             | 3    | 0.86  | 1.82 | 0.028   | 7544     | 13740    | 2069    | 7637    | 0.27  | 0.56   | up        |
| sp Q9H1E1 RNAS7_HUMAN            | 6    | 0.87  | 1.83 | 0.019   | 17933    | 32737    | 1735    | 18744   | 0.10  | 0.57   | up        |
| sp P22735 TGM1_HUMAN             | 19   | 0.87  | 1.83 | 0.017   | 87595    | 160119   | 9799    | 114635  | 0.11  | 0.72   | up        |
| sp P01019 ANGT_HUMAN             | 31   | 0.87  | 1.83 | 0.045   | 257340   | 470860   | 93727   | 305233  | 0.36  | 0.65   | up        |
| sp Q5XXA6 ANO1_HUMAN             | 6    | 0.87  | 1.83 | 0.010   | 12065    | 22096    | 2978    | 10926   | 0.25  | 0.49   | up        |
| sp P14923 PLAK_HUMAN             | 46   | 0.87  | 1.83 | 0.024   | 338159   | 620147   | 23631   | 471308  | 0.07  | 0.76   | up        |
| sp O00115 DNS2A_HUMAN            | 7    | 0.88  | 1.84 | 0.011   | 39433    | 72644    | 8520    | 43969   | 0.22  | 0.61   | up        |
| sp O95841 ANGL1_HUMAN            | 12   | 0.88  | 1.84 | 0.018   | 31282    | 57709    | 13488   | 30399   | 0.43  | 0.53   | up        |
| sp P01699 LV144_HUMAN            | 9    | 0.88  | 1.84 | 0.023   | 5727     | 10566    | 3410    | 5034    | 0.60  | 0.48   | up        |
| sp A0A075B6Q5 HV364_HUMAN        | 8    | 0.89  | 1.85 | 0.002   | 15112    | 27937    | 6657    | 7902    | 0.44  | 0.28   | up        |
| sp Q9BRK5 CAB45_HUMAN            | 17   | 0.89  | 1.85 | 0.018   | 255458   | 472424   | 81672   | 273905  | 0.32  | 0.58   | up        |
| sp P50591 TNF10_HUMAN            | 5    | 0.89  | 1.85 | 0.009   | 1834     | 3393     | 599     | 1328    | 0.33  | 0.39   | up        |
| sp O95395 GCNT3_HUMAN            | 7    | 0.89  | 1.85 | 0.013   | 28860    | 53515    | 13523   | 24859   | 0.47  | 0.46   | up        |
| sp Q08431 MPGM_HUMAN             | 28   | 0.89  | 1.86 | 0.011   | 88052    | 163506   | 32885   | 80947   | 0.37  | 0.50   | up        |
| sp Q9HBR0 S38AA_HUMAN            | 3    | 0.90  | 1.86 | 0.028   | 3807     | 7097     | 1703    | 3993    | 0.45  | 0.56   | up        |
| sp P80303 NUCB2_HUMAN            | 43   | 0.91  | 1.88 | 0.033   | 431033   | 809366   | 189583  | 513158  | 0.44  | 0.63   | up        |
| sp P61769 B2MG_HUMAN             | 23   | 0.91  | 1.88 | 0.016   | 328590   | 618350   | 48985   | 387682  | 0.15  | 0.63   | up        |
| tr A0A0J9YY99 A0A0J9YY99_HUMAN   | 7    | 0.92  | 1.89 | 0.007   | 14849    | 28005    | 6727    | 12000   | 0.45  | 0.43   | up        |
| sp O14638 ENPP3_HUMAN            | 9    | 0.92  | 1.89 | 0.004   | 5534     | 10455    | 2292    | 4461    | 0.41  | 0.43   | up        |
| sp P05089 ARGI1_HUMAN            | 14   | 0.93  | 1.90 | 0.031   | 75773    | 143985   | 22151   | 114228  | 0.29  | 0.79   | up        |
| sp Q99519 NEUR1_HUMAN            | 7    | 0.93  | 1.90 | 0.012   | 22694    | 43144    | 7871    | 22264   | 0.35  | 0.52   | up        |
| sp A0A0C4DH34 HV428_HUMAN        | 15   | 0.94  | 1.92 | 0.008   | 97397    | 186705   | 50526   | 77916   | 0.52  | 0.42   | up        |
| sp Q13421 MSLN_HUMAN             | 69   | 0.94  | 1.92 | 0.004   | 943612   | 1810780  | 303360  | 834807  | 0.32  | 0.46   | up        |
| sp Q8NBJ4 GOLM1_HUMAN            | 22   | 0.95  | 1.94 | 0.005   | 226143   | 437762   | 46348   | 217138  | 0.20  | 0.50   | up        |
| sp A0A0A0MS15 HV349_HUMAN        | 12   | 0.95  | 1.94 | 0.009   | 60242    | 116781   | 24482   | 52645   | 0.41  | 0.45   | up        |
| sp O43490 PROM1_HUMAN            | 16   | 0.96  | 1.94 | 0.003   | 70456    | 137003   | 23918   | 60136   | 0.34  | 0.44   | up        |
| sp P15907 SIAT1_HUMAN            | 9    | 0.97  | 1.95 | 0.002   | 26464    | 51713    | 10432   | 18397   | 0.39  | 0.36   | up        |
| sp Q9GZM7 TINAL_HUMAN            | 6    | 0.97  | 1.96 | 0.002   | 3438     | 6748     | 1209    | 2991    | 0.35  | 0.44   | up        |
| sp Q13217 DNJC3_HUMAN            | 33   | 0.98  | 1.97 | 0.012   | 303728   | 597837   | 99672   | 371792  | 0.33  | 0.62   | up        |
| sp Q9HC84 MUC5B_HUMAN            | 3    | 0.98  | 1.98 | 0.017   | 1688     | 3341     | 790     | 1510    | 0.47  | 0.45   | up        |
| sp O60784 TOM1_HUMAN             | 6    | 0.99  | 1.98 | 0.035   | 48220    | 95564    | 22169   | 65950   | 0.46  | 0.69   | up        |
| sp Q13438 OS9_HUMAN              | 27   | 0.99  | 1.98 | 0.012   | 74799    | 148295   | 20501   | 91629   | 0.27  | 0.62   | up        |
| sp Q9UBX5 FBLN5_HUMAN            | 3    | 0.99  | 1.99 | 0.026   | 1200     | 2386     | 691     | 731     | 0.58  | 0.31   | up        |
| sp Q9Y478 AAKB1_HUMAN            | 6    | 1.00  | 2.00 | 0.000   | 11175    | 22353    | 3118    | 7731    | 0.28  | 0.35   | up        |
| sp P0DTE7 AMY1B_HUMAN (+2)       | 39   | 1.02  | 2.02 | 0.037   | 265115   | 536343   | 68114   | 431833  | 0.26  | 0.81   | up        |
| tr A0A0G2J9Q6 A0A0G2J9Q6_HUMAN   | 7    | 1.02  | 2.03 | 0.009   | 9467     | 19240    | 5271    | 9027    | 0.56  | 0.47   | up        |
| sp Q9UBT3 DKK4_HUMAN             | 5    | 1.02  | 2.03 | 0.003   | 10416    | 21170    | 3661    | 10457   | 0.35  | 0.49   | up        |
| sp Q96P63 SPB12_HUMAN            | 12   | 1.03  | 2.04 | 0.002   | 34629    | 70660    | 4478    | 39210   | 0.13  | 0.55   | up        |

(continued on next page)

**Table A.6**

(continued)

| Accession                      | PSMs | logFC | FC    | PValue_ | mean_no  | mean_yes  | sd_no    | sd_yes    | cv_no | cv_yes | direction |
|--------------------------------|------|-------|-------|---------|----------|-----------|----------|-----------|-------|--------|-----------|
| sp P23490 LORI_HUMAN           | 13   | 1.03  | 2.04  | 0.035   | 24037    | 49078     | 7463     | 37016     | 0.31  | 0.75   | up        |
| sp Q02413 DSGI_HUMAN           | 24   | 1.03  | 2.04  | 0.002   | 118048   | 241103    | 25751    | 134903    | 0.22  | 0.56   | up        |
| sp A0A075B6J9 LV218_HUMAN      | 8    | 1.03  | 2.05  | 0.010   | 31075    | 63676     | 15138    | 30197     | 0.49  | 0.47   | up        |
| sp O60911 CATL2_HUMAN          | 8    | 1.04  | 2.05  | 0.029   | 11106    | 22764     | 2538     | 20555     | 0.23  | 0.90   | up        |
| sp O15041 SEM3E_HUMAN          | 7    | 1.04  | 2.05  | 0.001   | 12676    | 25984     | 3353     | 11423     | 0.26  | 0.44   | up        |
| sp P01721 LV657_HUMAN          | 9    | 1.04  | 2.05  | 0.001   | 71853    | 147287    | 16857    | 65586     | 0.23  | 0.45   | up        |
| sp P42357 HUTH_HUMAN           | 5    | 1.04  | 2.05  | 0.042   | 22219    | 45625     | 5433     | 45122     | 0.24  | 0.99   | up        |
| sp Q5T749 KPRP_HUMAN           | 10   | 1.04  | 2.06  | 0.006   | 14657    | 30140     | 1729     | 19141     | 0.12  | 0.64   | up        |
| sp Q08188 TGM3_HUMAN           | 28   | 1.04  | 2.06  | 0.033   | 40679    | 83866     | 13704    | 86141     | 0.34  | 1.03   | up        |
| sp Q15517 CDSN_HUMAN           | 5    | 1.06  | 2.08  | 0.008   | 26423    | 54933     | 8223     | 38262     | 0.31  | 0.70   | up        |
| sp Q5D862 FILA2_HUMAN          | 34   | 1.06  | 2.09  | 0.027   | 307238   | 642480    | 87770    | 537322    | 0.29  | 0.84   | up        |
| sp Q92485 ASM3B_HUMAN          | 3    | 1.07  | 2.09  | 0.002   | 23082    | 48349     | 14294    | 14700     | 0.62  | 0.30   | up        |
| sp P55058 PLTP_HUMAN           | 43   | 1.07  | 2.10  | 0.006   | 163033   | 342882    | 49210    | 192366    | 0.30  | 0.56   | up        |
| sp Q9NU19 TB22B_HUMAN          | 13   | 1.08  | 2.11  | 0.000   | 415854   | 878287    | 145128   | 327286    | 0.35  | 0.37   | up        |
| sp A0A0B4J1Y8 LV949_HUMAN      | 3    | 1.09  | 2.12  | 0.022   | 10720    | 22774     | 7706     | 12853     | 0.72  | 0.56   | up        |
| sp P05090 APOD_HUMAN           | 30   | 1.09  | 2.13  | 0.043   | 113748   | 242072    | 68817    | 195440    | 0.60  | 0.81   | up        |
| sp Q08554 DSC1_HUMAN           | 13   | 1.10  | 2.14  | 0.010   | 42644    | 91380     | 13316    | 67306     | 0.31  | 0.74   | up        |
| sp A0A0B4J2D9 KVD13_HUMAN (+1) | 20   | 1.10  | 2.15  | 0.007   | 50203    | 107690    | 21904    | 55540     | 0.44  | 0.52   | up        |
| sp Q99574 NEUS_HUMAN           | 13   | 1.10  | 2.15  | 0.004   | 67315    | 144740    | 17524    | 90430     | 0.26  | 0.62   | up        |
| sp Q8NES3 LFNG_HUMAN           | 9    | 1.11  | 2.15  | 0.001   | 22749    | 48964     | 7367     | 22206     | 0.32  | 0.45   | up        |
| sp P15924 DESP_HUMAN           | 117  | 1.12  | 2.17  | 0.012   | 604610   | 1314267   | 93577    | 1142978   | 0.15  | 0.87   | up        |
| sp Q86UD1 OAF_HUMAN            | 7    | 1.12  | 2.17  | 0.028   | 21268    | 46241     | 12086    | 36658     | 0.57  | 0.79   | up        |
| sp P25311 ZA2G_HUMAN           | 426  | 1.12  | 2.18  | 0.002   | 11800269 | 25695154  | 3661638  | 13030147  | 0.31  | 0.51   | up        |
| sp Q96QA5 GSDMA_HUMAN          | 6    | 1.13  | 2.18  | 0.021   | 44229    | 96627     | 7767     | 95047     | 0.18  | 0.98   | up        |
| sp A0A0B4J1X5 HV374_HUMAN      | 9    | 1.13  | 2.20  | 0.003   | 269311   | 591351    | 189394   | 167645    | 0.70  | 0.28   | up        |
| sp Q5T750 XP32_HUMAN           | 7    | 1.15  | 2.22  | 0.009   | 5165     | 11480     | 881      | 7596      | 0.17  | 0.66   | up        |
| sp P06831 HV434_HUMAN_family   | 5    | 1.16  | 2.23  | 0.015   | 60040    | 134156    | 42731    | 68496     | 0.71  | 0.51   | up        |
| sp Q06828 FMOD_HUMAN           | 6    | 1.16  | 2.24  | 0.010   | 15290    | 34284     | 7727     | 24279     | 0.51  | 0.71   | up        |
| sp P09958 FURIN_HUMAN          | 7    | 1.18  | 2.27  | 0.024   | 7072     | 16069     | 1423     | 15194     | 0.20  | 0.95   | up        |
| sp Q6UXI9 NPNT_HUMAN           | 6    | 1.19  | 2.29  | 0.001   | 7728     | 17684     | 2586     | 8274      | 0.33  | 0.47   | up        |
| sp P01034 CYTC_HUMAN           | 46   | 1.22  | 2.33  | 0.002   | 299461   | 697124    | 82827    | 431611    | 0.28  | 0.62   | up        |
| sp Q09328 MGT5A_HUMAN          | 4    | 1.23  | 2.34  | 0.001   | 3566     | 8346      | 804      | 3504      | 0.23  | 0.42   | up        |
| sp P01767 HV353_HUMAN          | 13   | 1.24  | 2.36  | 0.011   | 7376     | 17374     | 3368     | 13366     | 0.46  | 0.77   | up        |
| sp Q6UXB2 CXL17_HUMAN          | 10   | 1.27  | 2.41  | 0.025   | 51271    | 123527    | 27516    | 105035    | 0.54  | 0.85   | up        |
| sp P12273 PIP_HUMAN            | 396  | 1.28  | 2.43  | 0.001   | 11438567 | 27806049  | 4034273  | 15651254  | 0.35  | 0.56   | up        |
| sp Q04837 SSBP_HUMAN           | 3    | 1.28  | 2.44  | 0.000   | 1260     | 3069      | 355      | 1660      | 0.28  | 0.54   | up        |
| sp Q14515 SPRL1_HUMAN          | 35   | 1.29  | 2.44  | 0.004   | 253020   | 617991    | 150897   | 319965    | 0.60  | 0.52   | up        |
| sp Q9GZZ8 LACRT_HUMAN          | 85   | 1.29  | 2.45  | 0.006   | 5909023  | 14484550  | 3373433  | 8901467   | 0.57  | 0.61   | up        |
| sp P14138 EDN3_HUMAN           | 3    | 1.29  | 2.45  | 0.032   | 4409     | 10815     | 1784     | 13324     | 0.40  | 1.23   | up        |
| sp Q75556 SG2A1_HUMAN          | 100  | 1.32  | 2.50  | 0.021   | 557326   | 1395440   | 346821   | 1161660   | 0.62  | 0.83   | up        |
| sp P27487 DPP4_HUMAN           | 23   | 1.33  | 2.52  | 0.000   | 91904    | 231684    | 18562    | 123093    | 0.20  | 0.53   | up        |
| sp A0A075B6S5 KV127_HUMAN      | 10   | 1.34  | 2.54  | 0.031   | 24457    | 62079     | 16967    | 69124     | 0.69  | 1.11   | up        |
| sp P31025 LCN1_HUMAN           | 1079 | 1.36  | 2.57  | 0.010   | 52227172 | 134338658 | 27549695 | 122761267 | 0.53  | 0.91   | up        |
| sp Q8IW75 SPA12_HUMAN          | 3    | 1.37  | 2.59  | 0.002   | 22434    | 58181     | 8870     | 44611     | 0.40  | 0.77   | up        |
| sp P23381 SYWC_HUMAN           | 30   | 1.38  | 2.61  | 0.039   | 161690   | 421645    | 44192    | 592355    | 0.27  | 1.40   | up        |
| sp Q13336 UT1_HUMAN            | 3    | 1.40  | 2.65  | 0.018   | 3141     | 8312      | 2048     | 6102      | 0.65  | 0.73   | up        |
| sp P14555 PA2GA_HUMAN          | 88   | 1.42  | 2.67  | 0.000   | 1310891  | 3499307   | 400994   | 1929378   | 0.31  | 0.55   | up        |
| sp A2NJV5 KV229_HUMAN          | 16   | 1.48  | 2.78  | 0.009   | 13758    | 38302     | 10310    | 28728     | 0.75  | 0.75   | up        |
| sp Q95968 SG1D1_HUMAN          | 61   | 1.56  | 2.94  | 0.016   | 2454542  | 7212372   | 1979739  | 6262686   | 0.81  | 0.87   | up        |
| sp Q8WVV4 POF1B_HUMAN          | 10   | 1.59  | 3.02  | 0.013   | 10967    | 33113     | 1254     | 48058     | 0.11  | 1.45   | up        |
| sp P14902 I23O1_HUMAN          | 7    | 1.67  | 3.19  | 0.014   | 9738     | 31083     | 2238     | 33229     | 0.23  | 1.07   | up        |
| sp P47929 LEG7_HUMAN           | 5    | 1.72  | 3.30  | 0.019   | 55205    | 181966    | 13059    | 314222    | 0.24  | 1.73   | up        |
| sp A0A075B6K0 LV316_HUMAN      | 3    | 1.73  | 3.31  | 0.000   | 7518     | 24912     | 2378     | 13957     | 0.32  | 0.56   | up        |
| sp P01036 CYTS_HUMAN           | 121  | 1.79  | 3.45  | 0.000   | 171808   | 593182    | 84702    | 388392    | 0.49  | 0.65   | up        |
| sp Q15389 ANGP1_HUMAN          | 3    | 1.84  | 3.59  | 0.022   | 348      | 1249      | 501      | 788       | 1.44  | 0.63   | up        |
| sp P23280 CAH6_HUMAN           | 5    | 1.92  | 3.78  | 0.005   | 2408     | 9100      | 1055     | 10831     | 0.44  | 1.19   | up        |
| sp P20930 FILA_HUMAN           | 8    | 2.07  | 4.18  | 0.025   | 46914    | 196334    | 17052    | 413591    | 0.36  | 2.11   | up        |
| sp Q9UBS3 DNJB9_HUMAN          | 5    | 2.28  | 4.85  | 0.001   | 713      | 3453      | 564      | 2899      | 0.79  | 0.84   | up        |
| sp P01037 CYTN_HUMAN           | 142  | 2.74  | 6.67  | 0.002   | 224479   | 1497264   | 205871   | 1537742   | 0.92  | 1.03   | up        |
| sp P29034 S10A2_HUMAN          | 3    | 2.89  | 7.41  | 0.004   | 5029     | 37260     | 1135     | 83089     | 0.23  | 2.23   | up        |
| sp P28325 CYTD_HUMAN           | 13   | 3.13  | 8.76  | 0.000   | 14420    | 126281    | 5123     | 138570    | 0.36  | 1.10   | up        |
| sp P09228 CYTT_HUMAN           | 15   | 3.50  | 11.29 | 0.000   | 9505     | 107339    | 3967     | 182673    | 0.42  | 1.70   | up        |

**Table A.7**

Differentially expressed proteins between contact lens user and non-user (reference) with restricted Schirmer strip length – see Fig. 7B

| Accession             | PSMs | logFC | FC    | PValue | mean_yes | mean_no | sd_yes | sd_no  | cv_yes | cv_no | direction |
|-----------------------|------|-------|-------|--------|----------|---------|--------|--------|--------|-------|-----------|
| sp P09228 CYTT_HUMAN  | 18   | -1.35 | -2.55 | 0.031  | 40990    | 104660  | 17132  | 122968 | 0.42   | 1.17  | down      |
| sp P00746 CFAD_HUMAN  | 7    | -0.73 | -1.66 | 0.009  | 35632    | 59031   | 9615   | 23095  | 0.27   | 0.39  | down      |
| sp P41222 PTGDS_HUMAN | 9    | -0.63 | -1.55 | 0.023  | 71734    | 111264  | 16706  | 46166  | 0.23   | 0.41  | down      |
| sp P01880 IGHD_HUMAN  | 12   | 0.59  | 1.50  | 0.046  | 52027    | 34579   | 23527  | 8592   | 0.45   | 0.25  | up        |
| sp P05186 PPBT_HUMAN  | 20   | 0.60  | 1.51  | 0.029  | 171522   | 113452  | 64392  | 28630  | 0.38   | 0.25  | up        |
| sp P10398 ARAF_HUMAN  | 4    | 0.62  | 1.54  | 0.024  | 15039    | 9784    | 5493   | 2533   | 0.37   | 0.26  | up        |
| sp P15924 DESP_HUMAN  | 96   | 0.65  | 1.57  | 0.012  | 743440   | 474280  | 327638 | 48025  | 0.44   | 0.10  | up        |

(continued on next page)

Table A.7

(continued)

| Accession                        | PSMs | logFC | FC   | PValue | mean_yes | mean_no  | sd_yes   | sd_no   | cv_yes | cv_no | direction |
|----------------------------------|------|-------|------|--------|----------|----------|----------|---------|--------|-------|-----------|
| sp Q9H1E1 RNAS7_HUMAN            | 9    | 0.66  | 1.58 | 0.049  | 65419    | 41505    | 31619    | 10524   | 0.48   | 0.25  | up        |
| sp Q95395 GCNT3_HUMAN            | 10   | 0.69  | 1.61 | 0.007  | 98964    | 61471    | 33722    | 13751   | 0.34   | 0.22  | up        |
| sp P01619 KV320_HUMAN            | 36   | 0.69  | 1.61 | 0.010  | 307017   | 190562   | 121041   | 34171   | 0.39   | 0.18  | up        |
| sp Q9Y223 GLCNE_HUMAN            | 6    | 0.69  | 1.62 | 0.036  | 56557    | 34995    | 33905    | 8072    | 0.60   | 0.23  | up        |
| sp Q13459 MYO9B_HUMAN            | 3    | 0.71  | 1.64 | 0.014  | 4283     | 2615     | 1597     | 552     | 0.37   | 0.21  | up        |
| sp P30405 PPIF_HUMAN             | 3    | 0.72  | 1.65 | 0.004  | 39857    | 24140    | 16313    | 4444    | 0.41   | 0.18  | up        |
| sp P01040 CYTA_HUMAN             | 16   | 0.73  | 1.66 | 0.016  | 179829   | 108094   | 79648    | 25832   | 0.44   | 0.24  | up        |
| sp Q9UHD0 IL19_HUMAN             | 3    | 0.76  | 1.69 | 0.006  | 41462    | 24534    | 15854    | 2907    | 0.38   | 0.12  | up        |
| sp A0A0C4DH25 KVD20_HUMAN        | 4    | 0.76  | 1.69 | 0.015  | 143142   | 84583    | 70611    | 10399   | 0.49   | 0.12  | up        |
| sp Q02413 DSG1_HUMAN             | 18   | 0.76  | 1.70 | 0.004  | 182530   | 107422   | 68832    | 19030   | 0.38   | 0.18  | up        |
| sp Q13421 MSLN_HUMAN             | 87   | 0.77  | 1.71 | 0.027  | 2736224  | 1603541  | 1498027  | 275417  | 0.55   | 0.17  | up        |
| sp A0A0C4DH31 HV118_HUMAN        | 11   | 0.77  | 1.71 | 0.010  | 39873    | 23333    | 16514    | 4971    | 0.41   | 0.21  | up        |
| tr A0A075B7D0 A0A075B7D0_HUMAN   | 4    | 0.78  | 1.72 | 0.031  | 10887    | 6343     | 5474     | 1604    | 0.50   | 0.25  | up        |
| sp P22528 SPR1B_HUMAN            | 4    | 0.79  | 1.73 | 0.031  | 76094    | 44064    | 48700    | 7923    | 0.64   | 0.18  | up        |
| sp P01782 HV309_HUMAN (+1)       | 16   | 0.80  | 1.74 | 0.001  | 499678   | 287870   | 106608   | 75607   | 0.21   | 0.26  | up        |
| sp Q9H074 PAIP1_HUMAN            | 3    | 0.82  | 1.76 | 0.027  | 32121    | 18243    | 20812    | 4339    | 0.65   | 0.24  | up        |
| sp Q04609 FOLH1_HUMAN            | 10   | 0.82  | 1.77 | 0.014  | 77918    | 44110    | 40305    | 10279   | 0.52   | 0.23  | up        |
| sp A0A0B4J1Y9 HV372_HUMAN        | 4    | 0.87  | 1.83 | 0.024  | 20933    | 11445    | 13479    | 1979    | 0.64   | 0.17  | up        |
| sp A0A075B6K4 LV310_HUMAN        | 6    | 0.87  | 1.83 | 0.003  | 20553    | 11210    | 7517     | 2960    | 0.37   | 0.26  | up        |
| sp P01714 LV319_HUMAN            | 14   | 0.88  | 1.84 | 0.003  | 106111   | 57743    | 43259    | 9267    | 0.41   | 0.16  | up        |
| sp Q14894 CRYM_HUMAN             | 14   | 0.88  | 1.84 | 0.014  | 303154   | 164728   | 202194   | 31014   | 0.67   | 0.19  | up        |
| sp A0A0B4J1X8 HV343_HUMAN        | 6    | 0.89  | 1.85 | 0.020  | 37441    | 20271    | 18311    | 9592    | 0.49   | 0.47  | up        |
| sp P01700 LV147_HUMAN            | 7    | 0.89  | 1.86 | 0.019  | 40875    | 22033    | 24317    | 4467    | 0.59   | 0.20  | up        |
| sp Q15517 CDSN_HUMAN             | 6    | 0.89  | 1.86 | 0.000  | 28454    | 15317    | 9350     | 2687    | 0.33   | 0.18  | up        |
| sp B9A064 IGLL5_HUMAN            | 41   | 0.90  | 1.86 | 0.030  | 3874995  | 2083485  | 2577341  | 548387  | 0.67   | 0.26  | up        |
| tr S4R460 S4R460_HUMAN_family    | 11   | 0.90  | 1.86 | 0.012  | 53233    | 28615    | 30374    | 5474    | 0.57   | 0.19  | up        |
| sp A0A0C4DH32 HV320_HUMAN        | 11   | 0.90  | 1.87 | 0.037  | 63918    | 34153    | 49303    | 10678   | 0.77   | 0.31  | up        |
| sp Q86SQ4 AGRG6_HUMAN            | 5    | 0.91  | 1.88 | 0.006  | 7734     | 4122     | 3518     | 821     | 0.45   | 0.20  | up        |
| sp P16651 PRSS8_HUMAN            | 8    | 0.92  | 1.89 | 0.007  | 135804   | 71893    | 76430    | 11819   | 0.56   | 0.16  | up        |
| sp A0A075B6S5 KV127_HUMAN        | 12   | 0.93  | 1.90 | 0.008  | 142242   | 74862    | 74725    | 18102   | 0.53   | 0.24  | up        |
| sp Q08554 DSC1_HUMAN             | 7    | 0.93  | 1.90 | 0.001  | 114471   | 60210    | 45296    | 11998   | 0.40   | 0.20  | up        |
| sp A0A0C4DH38 HV551_HUMAN        | 20   | 0.93  | 1.91 | 0.011  | 105546   | 55378    | 60474    | 10074   | 0.57   | 0.18  | up        |
| sp A0A087WSY6 KVD15_HUMAN_family | 25   | 0.94  | 1.92 | 0.002  | 293790   | 152652   | 138827   | 21367   | 0.47   | 0.14  | up        |
| sp P01824 HV439_HUMAN            | 5    | 0.96  | 1.95 | 0.016  | 9795     | 5026     | 5809     | 1332    | 0.59   | 0.27  | up        |
| sp P01706 LV211_HUMAN            | 22   | 0.98  | 1.98 | 0.010  | 230803   | 116807   | 133514   | 29402   | 0.58   | 0.25  | up        |
| sp P20020 AT2B1_HUMAN            | 4    | 0.98  | 1.98 | 0.004  | 24344    | 12304    | 12799    | 3019    | 0.53   | 0.25  | up        |
| sp P01876 IGHA1_HUMAN            | 686  | 1.01  | 2.01 | 0.009  | 42792417 | 21268469 | 25945307 | 3895347 | 0.61   | 0.18  | up        |
| sp A0A0C4DH72 KV106_HUMAN        | 8    | 1.01  | 2.02 | 0.016  | 21274    | 10530    | 13732    | 3906    | 0.65   | 0.37  | up        |
| sp P01593 KVD33_HUMAN (+1)       | 21   | 1.02  | 2.03 | 0.019  | 171696   | 84540    | 125858   | 32873   | 0.73   | 0.39  | up        |
| sp Q5VIR6 VPS53_HUMAN            | 4    | 1.02  | 2.03 | 0.021  | 145974   | 71847    | 96776    | 18686   | 0.66   | 0.26  | up        |
| sp P04433 KV311_HUMAN            | 11   | 1.04  | 2.06 | 0.013  | 413366   | 200942   | 220541   | 83673   | 0.53   | 0.42  | up        |
| sp A0A075B6S6 KVD30_HUMAN        | 17   | 1.08  | 2.12 | 0.007  | 72242    | 34062    | 45961    | 6685    | 0.64   | 0.20  | up        |
| sp A0A0A0MS15 HV349_HUMAN        | 8    | 1.09  | 2.12 | 0.001  | 126094   | 59364    | 59680    | 13125   | 0.47   | 0.22  | up        |
| sp A0A0B4J1V6 HV373_HUMAN        | 4    | 1.09  | 2.13 | 0.046  | 102727   | 48139    | 105982   | 21360   | 1.03   | 0.44  | up        |
| sp P01764 HV323_HUMAN            | 6    | 1.13  | 2.19 | 0.000  | 24842    | 11323    | 10485    | 2086    | 0.42   | 0.18  | up        |
| sp P01834 IGKC_HUMAN             | 473  | 1.15  | 2.22 | 0.008  | 22535364 | 10160772 | 14386632 | 3121415 | 0.64   | 0.31  | up        |
| sp P0DOY2 IGLC2_HUMAN_family     | 45   | 1.15  | 2.23 | 0.004  | 9872099  | 4434459  | 5974218  | 976070  | 0.61   | 0.22  | up        |
| sp P01699 LV144_HUMAN            | 12   | 1.16  | 2.24 | 0.012  | 50562    | 22602    | 41059    | 7359    | 0.81   | 0.33  | up        |
| sp P01911 DRB1_HUMAN             | 3    | 1.17  | 2.25 | 0.008  | 45816    | 20364    | 31028    | 9098    | 0.68   | 0.45  | up        |
| sp A0A075B6I0 LV861_HUMAN        | 4    | 1.18  | 2.26 | 0.006  | 106764   | 47223    | 69788    | 15633   | 0.65   | 0.33  | up        |
| sp P01762 HV311_HUMAN            | 3    | 1.18  | 2.27 | 0.005  | 55063    | 24273    | 31793    | 7966    | 0.58   | 0.33  | up        |
| sp P01871 IGHM_HUMAN             | 140  | 1.19  | 2.28 | 0.017  | 5382387  | 2363344  | 4501961  | 365308  | 0.84   | 0.15  | up        |
| sp P01591 IGJ_HUMAN              | 158  | 1.19  | 2.28 | 0.006  | 6247553  | 2738635  | 4221636  | 498022  | 0.68   | 0.18  | up        |
| sp P01701 LV151_HUMAN            | 20   | 1.20  | 2.29 | 0.009  | 138352   | 60317    | 100104   | 12559   | 0.72   | 0.21  | up        |
| tr A0A0J9Y99 A0A0J9Y99_HUMAN     | 10   | 1.21  | 2.31 | 0.015  | 78679    | 33998    | 58852    | 9711    | 0.75   | 0.29  | up        |
| sp P01833 PIGR_HUMAN             | 883  | 1.22  | 2.32 | 0.002  | 47207095 | 20329989 | 28873792 | 3022167 | 0.61   | 0.15  | up        |
| sp P01703 LV140_HUMAN            | 6    | 1.22  | 2.33 | 0.001  | 71572    | 30667    | 35135    | 8391    | 0.49   | 0.27  | up        |
| sp A0A0C4DH67 KV108_HUMAN        | 5    | 1.23  | 2.34 | 0.002  | 42530    | 18185    | 28773    | 4000    | 0.68   | 0.22  | up        |
| sp A0A075B6H9 LV469_HUMAN        | 3    | 1.23  | 2.34 | 0.020  | 255586   | 109060   | 189140   | 62586   | 0.74   | 0.57  | up        |
| sp A0A075B6P5 KV228_HUMAN (+3)   | 20   | 1.23  | 2.35 | 0.002  | 157119   | 66867    | 93410    | 18453   | 0.59   | 0.28  | up        |
| sp P23490 LORI_HUMAN             | 6    | 1.26  | 2.40 | 0.020  | 45329    | 18866    | 50187    | 4687    | 1.11   | 0.25  | up        |
| sp P01767 HV353_HUMAN            | 6    | 1.27  | 2.41 | 0.018  | 71603    | 29725    | 56567    | 13101   | 0.79   | 0.44  | up        |
| sp A0A0B4J1V0 HV315_HUMAN        | 25   | 1.28  | 2.43 | 0.008  | 791739   | 325548   | 604688   | 76852   | 0.76   | 0.24  | up        |
| sp P01718 LV327_HUMAN            | 5    | 1.34  | 2.53 | 0.011  | 27133    | 10712    | 22241    | 4732    | 0.82   | 0.44  | up        |
| sp P01780 HV307_HUMAN            | 5    | 1.38  | 2.59 | 0.001  | 327633   | 126291   | 202367   | 31549   | 0.62   | 0.25  | up        |
| sp P01597 KV139_HUMAN (+1)       | 7    | 1.40  | 2.63 | 0.003  | 151057   | 57330    | 125375   | 11474   | 0.83   | 0.20  | up        |
| sp A0A0B4J1U7 HV601_HUMAN        | 16   | 1.40  | 2.64 | 0.007  | 471213   | 178592   | 377067   | 63454   | 0.80   | 0.36  | up        |
| sp A0A0C4DH34 HV428_HUMAN        | 12   | 1.48  | 2.79 | 0.000  | 199183   | 71323    | 126199   | 17527   | 0.63   | 0.25  | up        |
| sp A0A075B6I9 LV746_HUMAN        | 3    | 1.52  | 2.86 | 0.027  | 87575    | 30605    | 95672    | 20896   | 1.09   | 0.68  | up        |
| sp A0A0B4J1X5 HV374_HUMAN        | 7    | 1.53  | 2.89 | 0.000  | 628830   | 217851   | 358042   | 59530   | 0.57   | 0.27  | up        |
| sp P42858 HD_HUMAN               | 5    | 1.72  | 3.30 | 0.009  | 12929    | 3913     | 12624    | 2542    | 0.98   | 0.65  | up        |
| sp P01877 IGHA2_HUMAN            | 262  | 1.78  | 3.44 | 0.002  | 5659330  | 1643335  | 5064017  | 563640  | 0.89   | 0.34  | up        |
| sp P04211 LV743_HUMAN            | 3    | 1.94  | 3.83 | 0.001  | 15517    | 4056     | 13524    | 2194    | 0.87   | 0.54  | up        |
| sp A0A0B4J1U3 LV136_HUMAN        | 6    | 2.04  | 4.11 | 0.000  | 26518    | 6459     | 24782    | 861     | 0.93   | 0.13  | up        |
| sp A0A0A0MS14 HV145_HUMAN        | 3    | 2.26  | 4.79 | 0.000  | 38054    | 7937     | 19464    | 3873    | 0.51   | 0.49  | up        |
